# Supplementary material
Source: PubMed Central journal article supplement (PMC8521657)
Supplement: pnas.2101676118.sapp.pdf [file pnas.2101676118.sapp.pdf]

## **Supplementary Information for**

### **Large herbivores suppress liana infestation in an African savanna**

Tyler C. Coverdale, Ryan D. O'Connell, Matthew C. Hutchinson, Amanda Savagian, Tyler R. Kartzinel, Todd M. Palmer, Jacob R. Goheen, David J. Augustine, Mahesh Sankaran, Corina E. Tarnita, and Robert M. Pringle

Tyler C. Coverdale  
Email: [tc684@cornell.edu](mailto:tc684@cornell.edu)

Robert M. Pringle  
Email: [rpringle@princeton.edu](mailto:rpringle@princeton.edu)

#### **This PDF file includes:**

- Supplementary text
- Figures S1 to S4
- Tables S1 to S2
- Legends for Movies S1 to S4
- List of data deposited in Dryad
- SI References

#### **Other supplementary materials for this manuscript include the following:**

- Movies S1 to S4

## Supplementary Information Text

**Theoretical model description.** We built a simple ordinary differential equations model to capture the dynamics of tree and liana densities. Trees and free-standing lianas compete for the available space (given by the tree-carrying capacity  $K$ , or the liana-carrying capacity  $K/\eta$ ). Trees can be either healthy (S) or infested (I), and lianas can be found either free-standing (L) or growing on trees (henceforth, climbers). In the latter case, for simplicity, we assume that only one liana will occupy a tree. Consequently, lianas growing on trees are implicitly accounted for in the model via their hosts and, once a tree is infested, additional lianas that might climb it do not change its degree of infestation: i.e., they are assumed to either outcompete the predecessor or die.

We modeled infestation as a contagion process in which both free-standing and climbing lianas can spread to and infest healthy trees. Free-standing lianas and climbers both produce seeds (at rates  $\rho_L$  and  $\rho_I$ , respectively) that are wind-dispersed and therefore assumed to be randomly scattered across the landscape. Germinating seeds give rise to free-standing lianas; we assume that these (like *Cynanchum*) can grow adventitious roots, and thus vegetatively grow laterally until they encounter a tree that they can climb (regardless of how far away that tree is). Thus, we assume that infestation by free-standing lianas is a density-dependent process, reflected in a transmission probability  $\beta$  that encompasses dispersal of seeds and vegetative spread of free-standing lianas. Climbers can cause new infestations via lateral spread at rate  $c\tilde{\beta}$  to neighboring, possibly healthy trees. Thus, we assume that direct infestation by climbing lianas is a frequency-dependent process. We further assume that both seed production and vegetative growth are higher for climbers than for free-standing lianas; conversely, consistent with our empirical observations, infested trees have lower reproduction and higher mortality. Free-standing lianas and climbers naturally die at rates  $\delta_L$  and  $\delta_I$ , respectively, both of which are enhanced by the presence of herbivores,  $h_L$ .

Healthy and infested trees reproduce and naturally die at possibly different rates ( $r_S$  and  $r_I$ ,  $d_S$  and  $d_I$ , respectively) and their natural mortality is augmented by herbivore-induced mortalities,  $h_S$  and  $h_I$ , respectively.

$$\frac{dS}{dt} = (r_S S + r_I I) \left(1 - \frac{S + (1 + \eta)I + \eta L}{K}\right) + (\delta_I + h_L)I - (d_S + h_S)S - c\tilde{\beta} \frac{SI}{S + (1 + \eta)I + \eta L} - \beta SL$$

$$\frac{dI}{dt} = c\tilde{\beta} \frac{SI}{S + (1 + \eta)I + \eta L} + \beta SL - (\delta_I + h_L)I - (d_I + h_I)I$$

$$\frac{dL}{dt} = (\rho_L L + \rho_I I) \left(1 - \frac{S + (1 + \eta)I + \eta L}{K}\right) + d_I I - (\delta_L + h_L)L - \beta SL - \beta IL$$

**Model Analysis.** There are four equilibria: the trivial one (0,0,0), a mixed or endemic equilibrium ( $S^*, I^*, L^*$ ), and two pure equilibria, All-S = ( $K(1 - (d_S + h_S)/r_S), 0, 0$ ) and All-L = ( $0, 0, K/\eta(1 - (\delta_L + h_L)/\rho_L)$ ). Realistically, we assume that trees have a positive growth rate, both in the presence and in the absence of herbivores (i.e.,  $r_S > d_S + h_S$ ), and that lianas have a positive growth rate at least in the absence of herbivores (i.e.,  $\rho_L > \delta_L$ ). This makes the trivial equilibrium unstable; consequently, below we analyze the stability of the non-trivial equilibria. The endemic equilibrium is stable when neither All-L nor All-S is stable.

All-L is stable if the growth rate of free-living lianas is positive

$$\rho_L > \delta_L + h_L \quad (1)$$

and:

- a) either the per capita fitness of free-standing lianas exceeds that of healthy trees

$$\frac{\rho_L}{\delta_L + h_L} > \frac{r_S}{d_S + h_S} \quad (2)$$

- b) or, otherwise, the per capita fitness of free-standing lianas exceeds that of infested trees

$$\frac{r_S}{d_S + h_S} > \frac{\rho_L}{\delta_L + h_L} > \frac{r_I}{d_I + h_I} \quad (3)$$

and, in that case, the lateral spread of free-standing lianas must also be sufficiently high

$$\frac{\beta L^*}{\delta_I + d_I + h_I + h_L} > \frac{(\delta_L + h_L)r_S - (d_S + h_S)\rho_L}{(d_I + h_I)\rho_L - (\delta_L + h_L)r_I} \quad (4)$$

All-S is stable if:

- a) either the per capita fitness of healthy trees exceeds that of free-standing lianas

$$\frac{\rho_L}{\delta_L + h_L} < \frac{r_S}{d_S + h_S} \quad (5)$$

and, in that case, the expected number of trees infected via lateral spread by the first climber in the population must also be less than one

$$\frac{c\tilde{\beta}}{\delta_I + d_I + h_I + h_L} < 1 \quad (6)$$

- b) or, otherwise, the per capita fitness of free-standing lianas must exceed that of climbers

$$\frac{r_S}{d_S + h_S} > \frac{\rho_L}{\delta_L + h_L} > \frac{\rho_I}{\delta_I + h_I + h_L} \quad (7)$$

and, in addition, there is a lower bound<sup>1</sup> on  $\beta$  and an upper bound<sup>2</sup> on  $\tilde{\beta}$ . We assume that this case is not realistic in our system as it amounts to climbing being a bad life-history strategy for lianas, inconsistent with observations.

We want to find the conditions under which, in the presence of herbivory, All-S is stable, while in the absence of herbivory All-S is not stable and All-L either (i) is stable (in which

<sup>1</sup>  $\frac{\beta S^*}{\delta_I + d_I + h_I + h_L} > \frac{(d_S + h_S)\rho_L - r_S(\delta_L + h_L)}{(\delta_I + h_I + h_L)r_S - (d_S + h_S)\rho_I}$

<sup>2</sup>  $c\tilde{\beta} < \frac{-(\delta_I + d_I + h_I + h_L)((d_S + h_S)\rho_L - r_S(\delta_L + h_L)) + \beta S^*((d_I + h_I + h_L)r_S - (d_S + h_S)\rho_I)}{\beta K(r_S - d_S - h_S) + (\delta_L + h_L)r_S - (d_S + h_S)\rho_L}$

case the system ends up with only lianas) or (ii) is unstable (in which case the system ends up in the endemic equilibrium).

**In the presence of herbivores**, for All-S to be stable both eqns. (5) and (6) must hold: the per capita fitness of trees exceeds that of free-standing lianas and the expected number of trees infected via lateral spread by the first climber in the population is less than one (in other words, the  $R_0$  of the infestation is less than one).

**In the absence of herbivores**, for All-S to be unstable at least one of eqns. (5) or (6) must be violated, i.e.:

- a) either the per capita fitness of free-standing lianas exceeds that of healthy trees (i.e.  $\rho_L/\delta_L > r_S/d_S$ ), in which case **All-L is the only stable equilibrium**
- b) or, if not, then the expected number of trees infected via lateral spread by the first climber in the population must be at least one (i.e.  $c\tilde{\beta}/(\delta_I + d_I) \geq 1$ ). In this case, which equilibrium is stable depends on eqn. (1), which is true by our assumption, and on eqns. (3) and (4):
  - i. if at least one of them does not hold, i.e., the per capita fitness of free-standing lianas is lower than that of infested trees ( $\rho_L/\delta_L \leq r_I/d_I$ ) or free-standing lianas are limited in their vegetative spread (i.e.,  $\beta$  not too high), then **the only stable equilibrium is the endemic (mixed) one**.
  - ii. if both hold, then **All-L is the only stable equilibrium**.

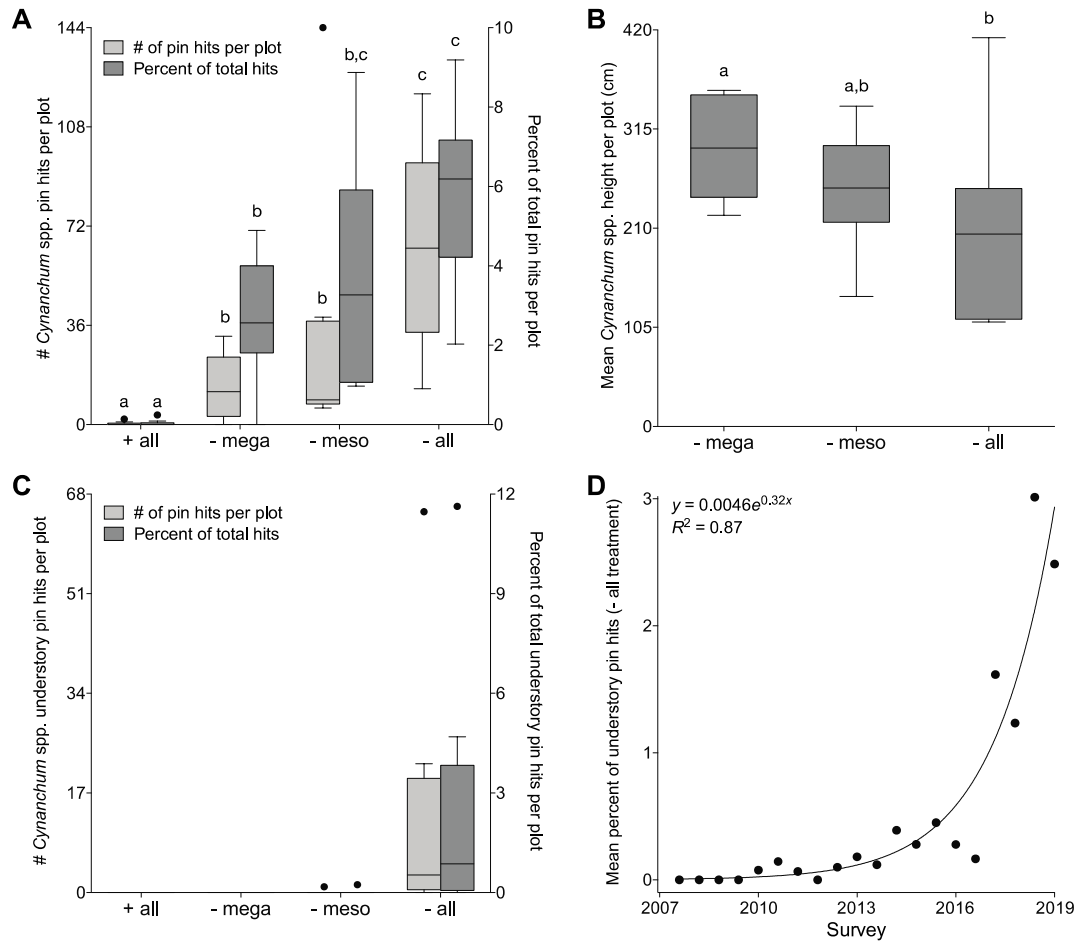

**Fig. S1. Liana infestation in overstory and understory after 10 yr of herbivore exclusion.** (A) Prevalence of *Cynanchum* spp. across treatments in November 2018. Tukey plots (boxes, median and IQR; whiskers up to  $\pm 1.5 \times \text{IQR}$ ; points, outliers) show summed *Cynanchum* spp. pin hits per plot (left y-axis) and as a percentage of total pin hits across all species (right y-axis). Connecting letters denote significant differences ( $P \leq 0.05$ ) among treatments in Tukey's HSD contrasts from one-way ANOVA on square-root-transformed data ( $n = 9$  plots per treatment, 49 pin placements per plot;  $F_{3,32} = 18.16$ ,  $P < 0.0001$  for summed pin hits and  $F_{3,32} = 26.85$ ,  $P < 0.0001$  for percent). (B) Mean height of *Cynanchum* spp. pin hits in the fenced enclosure treatments in November 2018; the +all treatment is excluded because *Cynanchum* spp. were recorded in just 2 of 9 plots (with just 2 and 1 total pin hits in those plots). Boxplot conventions as in A; connecting letters denote significant differences among treatments in Tukey's HSD contrasts from one-way ANOVA on square-root transformed data ( $F_{2,23} = 3.59$ ,  $P = 0.044$ ). (C) Prevalence of *Cynanchum* spp. in the understory of each treatment in February 2019; boxplot conventions as in A ( $n = 9$  plots per treatment, 49 placements of a 10-pin frame per plot), showing that *Cynanchum* occurred in the understory exclusively in -all plots (up to 12% of pin hits, mean 2.5%). (D) In -all plots, prevalence of *Cynanchum* in the understory increased exponentially from October 2008 to February 2019. Points are means across the 9 -all plots in each of 20 semi-annual surveys (wet and dry seasons); exponential growth model ( $x$  is survey number, 1–20) and  $R^2$  are at top left. All panels lump *C. viminale* and *C. gerrardii*; the former accounted for >99% of pin hits in both overstory and understory.

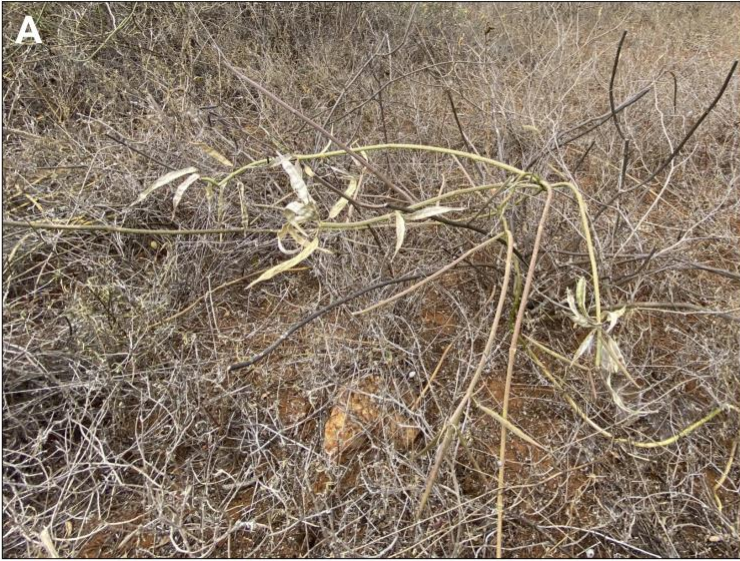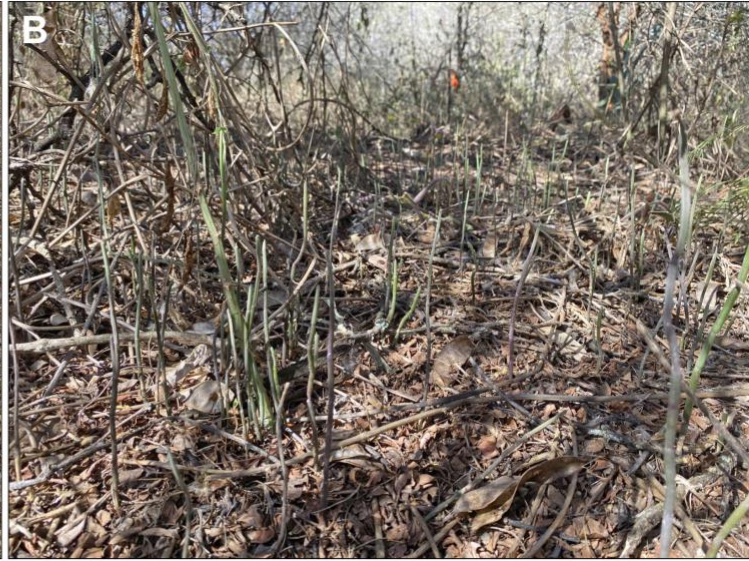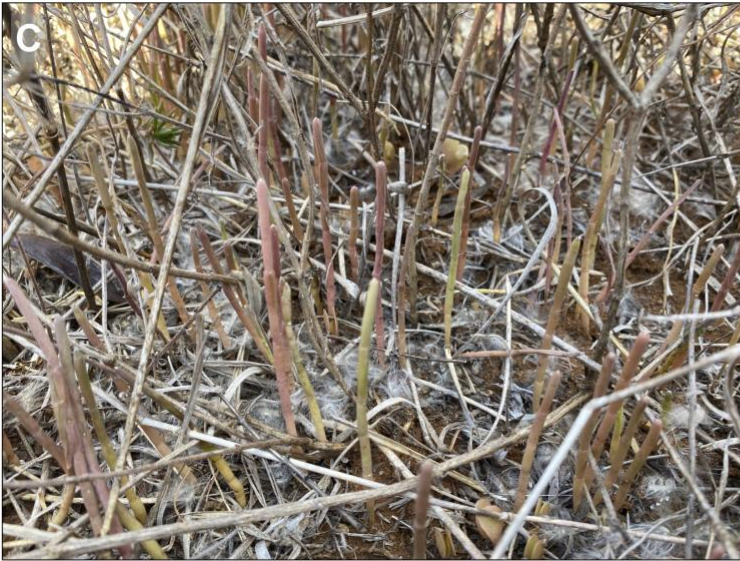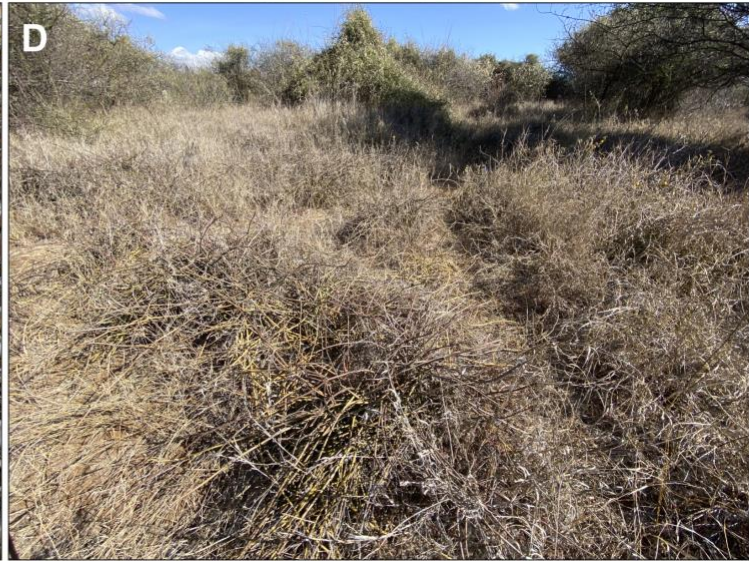

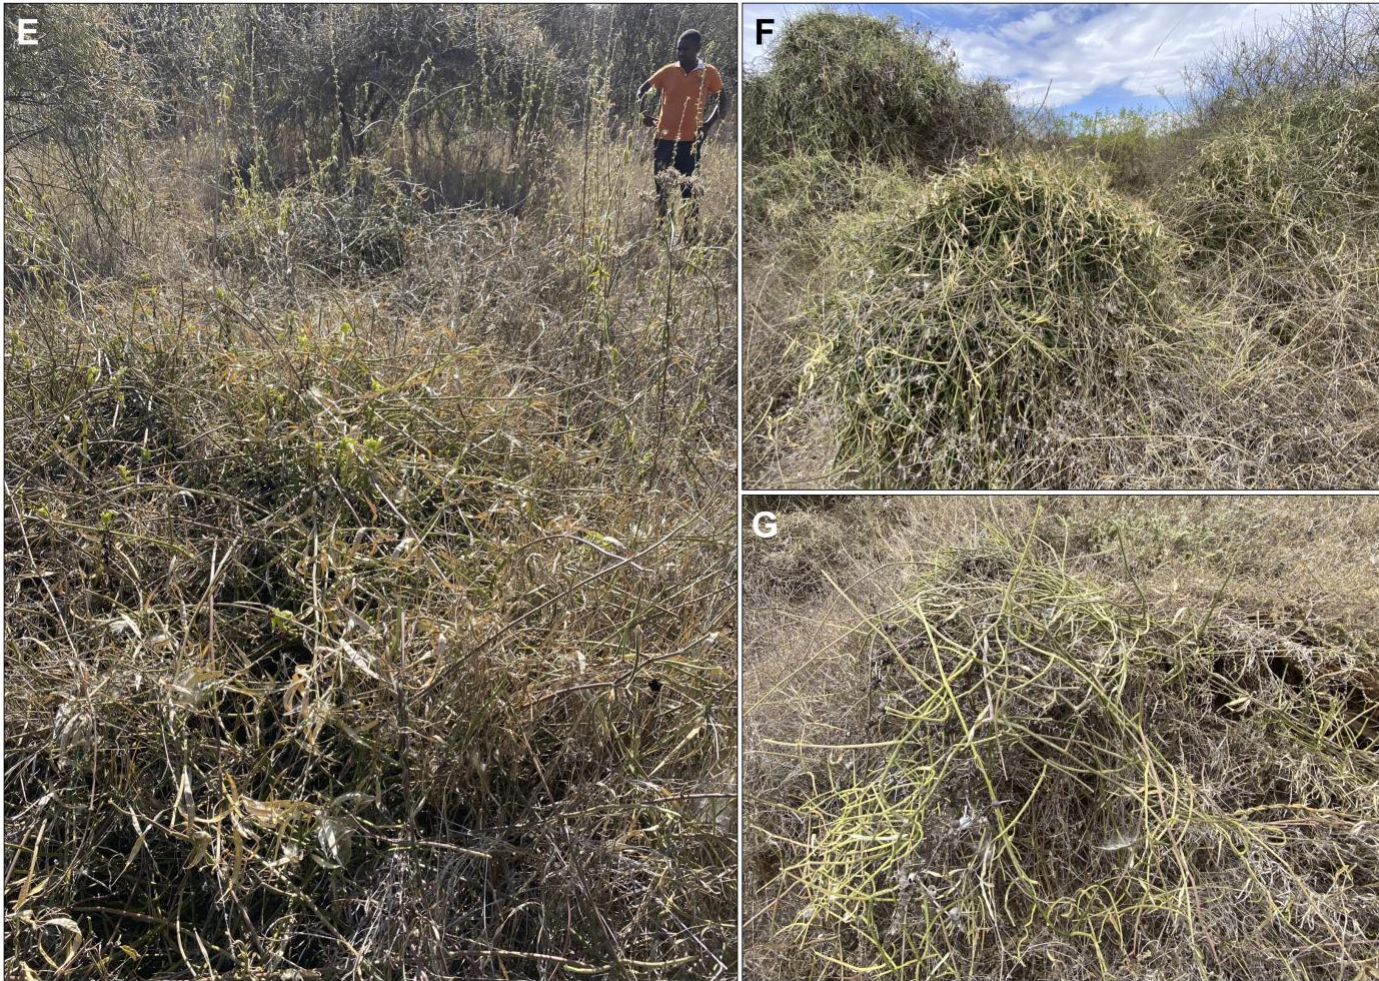

**Fig. S2. *Cynanchum* infestation in UHURU -all plots, March 2021. (A)** Reproductive free-standing liana, *C. viminalis*, in the understory (note dehiscent seed pods). **(B)** Juvenile lianas recruiting in near-monoculture under tree canopy. **(C)** Lianas recruiting in near-monoculture under bunchgrass canopy, with current year's white-plumed seeds covering the ground. **(D)** Free-standing lianas overtopping grasses in the understory (foreground) and large *Acacia* (*Vachellia*) *etbaica* (background). **(E)** Reproductive lianas dominating both the understory (foreground) and tree canopies (top left and center). **(F)** Trees completely covered by lianas. **(G)** *Acacia* (*Vachellia*) *drepanolobium* tree top-killed under heavy liana cover.

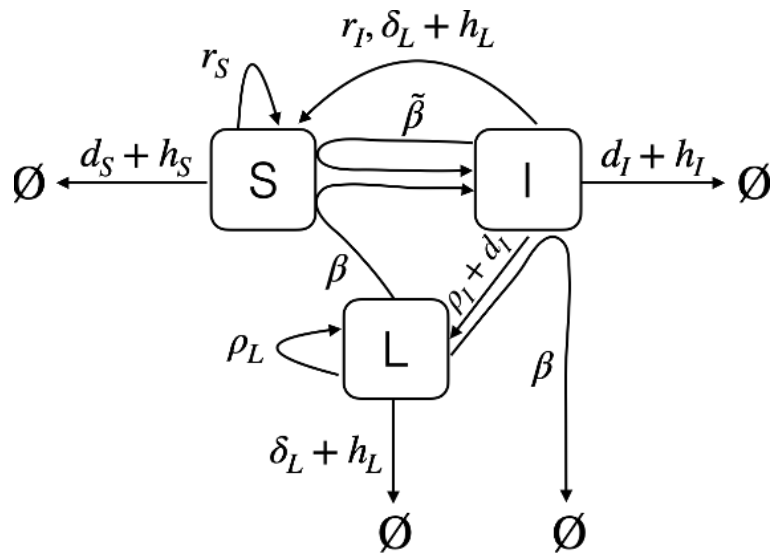

**Fig. S3. Model schematic.** See Supplementary text (*Theoretical model description*) for parameter definitions.



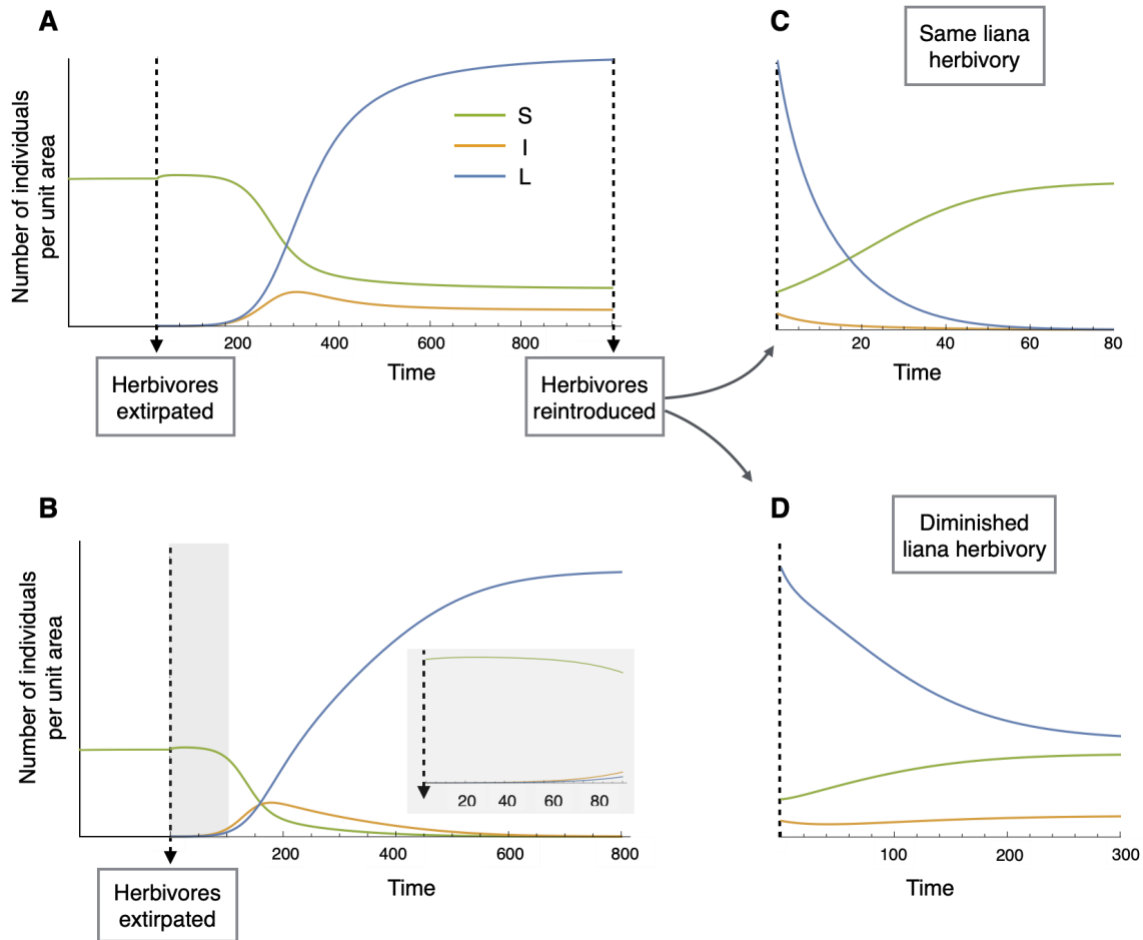

**Fig. S4. Illustrative model predictions of long-term liana-tree dynamics following herbivore extirpation and subsequent reintroduction.** A system with vanishingly few lianas in the presence of herbivores can end up in **(A)** an endemic equilibrium in the absence of herbivores or **(B)** an alternative, all-liana state; inset shows close-up of the first 100 years after the extirpation of herbivores corresponding to the grey region in (B). **(C,D)** Effects of reintroducing herbivores on the endemic equilibrium in (A) if the restored herbivore assemblage feeds on the lianas at **(C)** the same rate or **(D)** a lower rate than the pre-extirpation assemblage. Parameters: (A)  $\beta = 0.00001$ ; (B)  $\beta = 0.0001$ ; when herbivores are present in (A,B),  $h_S = 0.002$ ,  $h_L = 0.1$ , and  $h_I = 0.01$ ; (C,D) same parameters as in (A) with herbivory, except in (D)  $h_L = 0.01$ . Across all panels, the remaining parameters are:  $K = 500$ ,  $\eta = 0.3$ ,  $r_S = 0.1$ ,  $d_S = 0.01$ ,  $r_I = 0.05$ ,  $d_I = 0.025$ ,  $\rho_L = 0.1$ ,  $\delta_L = 0.02$ ,  $\rho_I = 0.3$ ,  $\delta_I = 0.01$ ,  $c = 6$ ,  $\tilde{\beta} = 0.01$ . Carrying capacity is measured in individuals per unit area. All rates are per year; transmission rates are in meters per year. We selected parameters solely for exemplification, loosely informed by field intuition and (for healthy trees) by previous demographic work at Mpala; we emphasize that our model-based inferences do not depend on parameterization or the illustrative simulations shown here.

**Table S1. Summary data on *Cynanchum* consumption by herbivore species.** Shown for each of the 20 most common large-herbivore species in our study area are the number of fecal samples analyzed with DNA metabarcoding (*n*), the mean and SEM relative read abundance (RRA) of *Cynanchum* DNA sequences in samples from that species, the maximum *Cynanchum* RRA present in any individual sample from that species, the number of samples in which *Cynanchum* DNA was present (at  $\geq 0.1\%$  RRA), and the frequency of occurrence (FOO) of *Cynanchum* DNA in samples for that species. Species are listed from top to bottom in decreasing order of mean RRA. The RRA and FOO data match those shown in Fig. 1 of the main text. Sample-specific data are in Table S2.

| Species       | Latin name                      | Type     | <i>n</i> | Mean RRA (%) | SEM RRA | Maximum individual RRA | <i>n</i> samples present | FOO (%) |
|---------------|---------------------------------|----------|----------|--------------|---------|------------------------|--------------------------|---------|
| Dik-Dik       | <i>Madoqua cf. M. guentheri</i> | Wild     | 120      | 0.35%        | 0.076%  | 5.2%                   | 60                       | 50.0%   |
| Giraffe       | <i>Giraffa camelopardalis</i>   | Wild     | 58       | 0.29%        | 0.055%  | 2.5%                   | 37                       | 63.8%   |
| Bushbuck      | <i>Tragelaphus scriptus</i>     | Wild     | 12       | 0.22%        | 0.030%  | 0.4%                   | 11                       | 91.7%   |
| Elephant      | <i>Loxodonta africana</i>       | Wild     | 80       | 0.19%        | 0.055%  | 3.7%                   | 37                       | 46.3%   |
| Kudu          | <i>Tragelaphus strepsiceros</i> | Wild     | 28       | 0.13%        | 0.026%  | 0.5%                   | 16                       | 57.1%   |
| Impala        | <i>Aepyceros melampus</i>       | Wild     | 129      | 0.11%        | 0.037%  | 4.5%                   | 40                       | 31.0%   |
| Waterbuck     | <i>Kobus defassa</i>            | Wild     | 6        | 0.10%        | 0.026%  | 0.2%                   | 5                        | 83.3%   |
| Goat          | <i>Capra hircus</i>             | Domestic | 19       | 0.06%        | 0.019%  | 0.3%                   | 8                        | 42.1%   |
| Eland         | <i>Taurotragus oryx</i>         | Wild     | 54       | 0.04%        | 0.017%  | 0.7%                   | 10                       | 18.5%   |
| Camel         | <i>Camelus dromedarius</i>      | Domestic | 39       | 0.04%        | 0.011%  | 0.3%                   | 12                       | 30.8%   |
| Cattle        | <i>Bos taurus</i>               | Domestic | 163      | 0.04%        | 0.007%  | 0.5%                   | 32                       | 19.6%   |
| Sheep         | <i>Ovis aires</i>               | Domestic | 48       | 0.03%        | 0.010%  | 0.3%                   | 10                       | 20.8%   |
| Oryx          | <i>Oryx beisa</i>               | Wild     | 22       | 0.03%        | 0.012%  | 0.2%                   | 5                        | 22.7%   |
| Warthog       | <i>Phacochoerus africanus</i>   | Wild     | 30       | 0.02%        | 0.010%  | 0.2%                   | 5                        | 16.7%   |
| Buffalo       | <i>Syncerus caffer</i>          | Wild     | 92       | 0.02%        | 0.007%  | 0.4%                   | 11                       | 12.0%   |
| Hippo         | <i>Hippopotamus amphibius</i>   | Wild     | 23       | 0.02%        | 0.009%  | 0.1%                   | 5                        | 21.7%   |
| Hartebeest    | <i>Alcelaphus buselaphus</i>    | Wild     | 27       | 0.02%        | 0.009%  | 0.2%                   | 4                        | 14.8%   |
| Grevy's zebra | <i>Equus grevyi</i>             | Wild     | 91       | 0.02%        | 0.006%  | 0.4%                   | 10                       | 11.0%   |
| Donkey        | <i>Equus asinus</i>             | Domestic | 29       | 0.01%        | 0.008%  | 0.2%                   | 3                        | 10.3%   |
| Plains zebra  | <i>Equus quagga</i>             | Wild     | 106      | 0.01%        | 0.003%  | 0.3%                   | 5                        | 4.7%    |

**Table S2. Data on *Cynanchum* consumption for each individual fecal sample.**

Shown for each of the 1,176 fecal samples analyzed with DNA metabarcoding are the herbivore species, sample ID assigned at collection, relative read abundance (RRA) of *Cynanchum* DNA (here as proportion rather than percent), whether *Cynanchum* was present (1) or absent (0) from the sample, date of sample collection, collection location (decimal degrees), and total sequence read depth. Full information on the production and curation of these data is in references S1–S3.

|    | Species | SampleID | RRA   | Present? | Sample Date | Longitude | Latitude | Read depth |
|----|---------|----------|-------|----------|-------------|-----------|----------|------------|
| 1  | Buffalo | WAT204   | 0.004 | 1        | 3/12/15     | 36.91     | 0.29     | 14406      |
| 2  | Buffalo | BUF209   | 0.003 | 1        | 3/13/15     | 36.89     | 0.29     | 11736      |
| 3  | Buffalo | WAT203   | 0.003 | 1        | 3/12/15     | 36.91     | 0.29     | 2145       |
| 4  | Buffalo | BUF18    | 0.002 | 1        | 7/10/13     | 36.91     | 0.34     | 12785      |
| 5  | Buffalo | BUF204   | 0.002 | 1        | 3/8/15      | 36.86     | 0.30     | 24595      |
| 6  | Buffalo | WAT202   | 0.002 | 1        | 3/12/15     | 36.91     | 0.29     | 2092       |
| 7  | Buffalo | BUF207   | 0.001 | 1        | 3/10/15     | 36.91     | 0.32     | 16156      |
| 8  | Buffalo | BUF211   | 0.001 | 1        | 3/13/15     | 36.89     | 0.28     | 18866      |
| 9  | Buffalo | BUF221   | 0.001 | 1        | 3/18/15     | 36.91     | 0.28     | 13511      |
| 10 | Buffalo | WAT205   | 0.001 | 1        | 3/12/15     | 36.91     | 0.29     | 1930       |
| 11 | Buffalo | WHO206   | 0.001 | 1        | 3/16/15     | 36.91     | 0.29     | 75710      |
| 12 | Buffalo | BUF01    | 0.000 | 0        | 6/26/13     | 36.89     | 0.35     | 12507      |
| 13 | Buffalo | BUF02    | 0.000 | 0        | 6/26/13     | 36.89     | 0.35     | 31455      |
| 14 | Buffalo | BUF03    | 0.000 | 0        | 6/26/13     | 36.89     | 0.36     | 18924      |
| 15 | Buffalo | BUF04    | 0.000 | 0        | 6/27/13     | 36.93     | 0.37     | 7013       |
| 16 | Buffalo | BUF05    | 0.000 | 0        | 6/27/13     | 36.87     | 0.38     | 14076      |
| 17 | Buffalo | BUF06    | 0.000 | 0        | 6/28/13     | 36.89     | 0.28     | 8983       |
| 18 | Buffalo | BUF07    | 0.000 | 0        | 7/3/13      | 36.90     | 0.29     | 9372       |
| 19 | Buffalo | BUF08    | 0.000 | 0        | 7/3/13      | 36.90     | 0.29     | 8999       |
| 20 | Buffalo | BUF09    | 0.000 | 0        | 7/4/13      | 36.89     | 0.29     | 6002       |
| 21 | Buffalo | BUF10    | 0.000 | 0        | 7/4/13      | 36.88     | 0.32     | 8464       |
| 22 | Buffalo | BUF101   | 0.000 | 0        | 10/27/14    | 36.87     | 0.36     | 145646     |
| 23 | Buffalo | BUF102   | 0.000 | 0        | 10/27/14    | 36.86     | 0.30     | 119633     |
| 24 | Buffalo | BUF103   | 0.000 | 0        | 10/28/14    | 36.92     | 0.38     | 78795      |
| 25 | Buffalo | BUF104   | 0.000 | 0        | 11/1/14     | 36.90     | 0.30     | 109818     |
| 26 | Buffalo | BUF105   | 0.000 | 0        | 11/2/14     | 36.88     | 0.29     | 65858      |
| 27 | Buffalo | BUF106   | 0.000 | 0        | 11/3/14     | 36.91     | 0.32     | 72386      |
| 28 | Buffalo | BUF107   | 0.000 | 0        | 11/3/14     | 36.92     | 0.35     | 31447      |
| 29 | Buffalo | BUF108   | 0.000 | 0        | 11/4/14     | 36.91     | 0.31     | 70533      |
| 30 | Buffalo | BUF109   | 0.000 | 0        | 11/4/14     | 36.91     | 0.31     | 108630     |
| 31 | Buffalo | BUF11    | 0.000 | 0        | 7/5/13      |           |          | 23334      |

|    |         |           |       |   |         |       |      |       |
|----|---------|-----------|-------|---|---------|-------|------|-------|
| 32 | Buffalo | BUF110    | 0.000 | 0 | 11/4/14 | 36.89 | 0.28 | 96114 |
| 33 | Buffalo | BUF12     | 0.000 | 0 | 7/6/13  | 36.91 | 0.34 | 10545 |
| 34 | Buffalo | BUF13     | 0.000 | 0 | 7/8/13  | 36.92 | 0.35 | 11141 |
| 35 | Buffalo | BUF14     | 0.000 | 0 | 7/8/13  | 36.92 | 0.35 | 25756 |
| 36 | Buffalo | BUF15     | 0.000 | 0 | 7/8/13  | 36.93 | 0.37 | 7840  |
| 37 | Buffalo | BUF16     | 0.000 | 0 | 7/8/13  | 36.91 | 0.42 | 12979 |
| 38 | Buffalo | BUF17     | 0.000 | 0 | 7/8/13  | 36.91 | 0.42 | 15586 |
| 39 | Buffalo | BUF19     | 0.000 | 0 | 7/10/13 | 36.91 | 0.41 | 18209 |
| 40 | Buffalo | BUF20     | 0.000 | 0 | 7/10/13 | 36.91 | 0.41 | 21425 |
| 41 | Buffalo | BUF201    | 0.000 | 0 | 3/3/15  | 36.86 | 0.31 | 11565 |
| 42 | Buffalo | BUF202    | 0.000 | 0 | 3/3/15  | 36.87 | 0.31 | 17729 |
| 43 | Buffalo | BUF203    | 0.000 | 0 | 3/8/15  | 36.86 | 0.30 | 25041 |
| 44 | Buffalo | BUF205    | 0.000 | 0 | 3/8/15  | 36.86 | 0.30 | 16000 |
| 45 | Buffalo | BUF206    | 0.000 | 0 | 3/8/15  | 36.86 | 0.30 | 10541 |
| 46 | Buffalo | BUF208    | 0.000 | 0 | 3/10/15 | 36.86 | 0.29 | 17358 |
| 47 | Buffalo | BUF210    | 0.000 | 0 | 3/13/15 | 36.89 | 0.28 | 22510 |
| 48 | Buffalo | BUF212    | 0.000 | 0 | 3/13/15 | 36.89 | 0.28 | 33056 |
| 49 | Buffalo | BUF213    | 0.000 | 0 | 3/13/15 | 36.89 | 0.28 | 47028 |
| 50 | Buffalo | BUF214_PC | 0.000 | 0 | 3/13/15 | 36.89 | 0.28 | 67214 |
| 51 | Buffalo | BUF214_TK | 0.000 | 0 | 3/13/15 | 36.86 | 0.30 | 50760 |
| 52 | Buffalo | BUF215_A  | 0.000 | 0 | 3/13/15 | 36.87 | 0.30 | 53079 |
| 53 | Buffalo | BUF215_B  | 0.000 | 0 | 3/13/15 |       |      | 53940 |
| 54 | Buffalo | BUF216    | 0.000 | 0 | 3/16/15 | 36.87 | 0.30 | 61266 |
| 55 | Buffalo | BUF217    | 0.000 | 0 | 3/16/15 | 36.88 | 0.30 | 54469 |
| 56 | Buffalo | BUF218    | 0.000 | 0 | 3/18/15 | 36.91 | 0.28 | 68196 |
| 57 | Buffalo | BUF219    | 0.000 | 0 | 3/18/15 | 36.91 | 0.28 | 66042 |
| 58 | Buffalo | BUF220    | 0.000 | 0 | 3/18/15 | 36.91 | 0.28 | 7229  |
| 59 | Buffalo | BUF222    | 0.000 | 0 | 3/18/15 | 36.91 | 0.28 | 10501 |
| 60 | Buffalo | BUF223    | 0.000 | 0 | 3/18/15 | 36.87 | 0.29 | 20715 |
| 61 | Buffalo | BUF23     | 0.000 | 0 | 7/11/13 | 36.92 | 0.35 | 28805 |
| 62 | Buffalo | BUF24     | 0.000 | 0 | 7/11/13 | 36.92 | 0.36 | 16233 |
| 63 | Buffalo | BUF25     | 0.000 | 0 | 7/11/13 | 36.83 | 0.51 | 12531 |
| 64 | Buffalo | BUF26     | 0.000 | 0 | 7/11/13 | 36.82 | 0.49 | 21713 |
| 65 | Buffalo | BUF27     | 0.000 | 0 | 7/12/13 | 36.91 | 0.30 | 22804 |
| 66 | Buffalo | BUF28     | 0.000 | 0 | 7/12/13 | 36.91 | 0.31 | 24554 |
| 67 | Buffalo | BUF29     | 0.000 | 0 | 7/12/13 | 36.92 | 0.35 | 35958 |
| 68 | Buffalo | BUF30     | 0.000 | 0 | 7/12/13 | 36.92 | 0.35 | 21195 |
| 69 | Buffalo | BUF31     | 0.000 | 0 | 7/12/13 | 36.87 | 0.30 | 28422 |
| 70 | Buffalo | BUF32     | 0.000 | 0 | 7/12/13 | 36.87 | 0.31 | 27843 |

|     |          |        |       |   |         |       |      |        |
|-----|----------|--------|-------|---|---------|-------|------|--------|
| 71  | Buffalo  | BUF33  | 0.000 | 0 | 7/12/13 | 36.89 | 0.29 | 27551  |
| 72  | Buffalo  | BUF34  | 0.000 | 0 | 7/12/13 | 36.89 | 0.29 | 24763  |
| 73  | Buffalo  | BUF35  | 0.000 | 0 | 7/12/13 | 36.88 | 0.30 | 49414  |
| 74  | Buffalo  | BUF36  | 0.000 | 0 | 7/12/13 | 36.88 | 0.30 | 26430  |
| 75  | Buffalo  | BUF37  | 0.000 | 0 | 7/12/13 | 36.89 | 0.28 | 18671  |
| 76  | Buffalo  | BUF38  | 0.000 | 0 | 7/14/13 | 36.91 | 0.34 | 15076  |
| 77  | Buffalo  | BUF39  | 0.000 | 0 | 7/15/13 | 36.91 | 0.40 | 20954  |
| 78  | Buffalo  | BUF40  | 0.000 | 0 | 7/16/13 |       |      | 11653  |
| 79  | Buffalo  | BUF41  | 0.000 | 0 | 7/16/13 |       |      | 25038  |
| 80  | Buffalo  | LM0028 | 0.000 | 0 | 7/16/16 | 36.91 | 0.28 | 147632 |
| 81  | Buffalo  | LM0077 | 0.000 | 0 | 7/18/16 |       |      | 190824 |
| 82  | Buffalo  | LM0083 | 0.000 | 0 | 7/19/16 | 37.02 | 0.28 | 193642 |
| 83  | Buffalo  | LM0088 | 0.000 | 0 | 7/19/16 | 37.03 | 0.30 | 258075 |
| 84  | Buffalo  | LM0115 | 0.000 | 0 | 7/19/16 |       |      | 7496   |
| 85  | Buffalo  | LM0162 | 0.000 | 0 | 7/22/16 | 36.89 | 0.31 | 78503  |
| 86  | Buffalo  | LM0163 | 0.000 | 0 | 7/22/16 | 36.89 | 0.31 | 23547  |
| 87  | Buffalo  | LM0164 | 0.000 | 0 | 7/22/16 | 36.89 | 0.31 | 2708   |
| 88  | Buffalo  | LM0243 | 0.000 | 0 | 7/28/16 | 36.89 | 0.28 | 47269  |
| 89  | Buffalo  | LM0294 | 0.000 | 0 | 7/10/16 | 36.88 | 0.31 | 12200  |
| 90  | Buffalo  | WAT206 | 0.000 | 0 | 3/12/15 | 36.91 | 0.29 | 2661   |
| 91  | Buffalo  | WAT207 | 0.000 | 0 | 3/12/15 | 36.91 | 0.29 | 8218   |
| 92  | Buffalo  | WAT208 | 0.000 | 0 | 3/12/15 | 36.91 | 0.28 | 83255  |
| 93  | Bushbuck | BUS205 | 0.004 | 1 | 3/5/15  | 36.91 | 0.32 | 10880  |
| 94  | Bushbuck | BUS203 | 0.003 | 1 | 3/5/15  | 36.91 | 0.32 | 28972  |
| 95  | Bushbuck | BUS206 | 0.003 | 1 | 3/5/15  | 36.91 | 0.32 | 4950   |
| 96  | Bushbuck | BUS211 | 0.003 | 1 | 3/14/15 | 36.91 | 0.32 | 56607  |
| 97  | Bushbuck | BUS202 | 0.002 | 1 | 3/5/15  | 36.91 | 0.32 | 3622   |
| 98  | Bushbuck | BUS204 | 0.002 | 1 | 3/5/15  | 36.91 | 0.32 | 25737  |
| 99  | Bushbuck | BUS207 | 0.002 | 1 | 3/7/15  | 36.91 | 0.28 | 2401   |
| 100 | Bushbuck | BUS208 | 0.002 | 1 | 3/12/15 | 36.91 | 0.32 | 2138   |
| 101 | Bushbuck | BUS209 | 0.002 | 1 | 3/12/15 | 36.91 | 0.32 | 39622  |
| 102 | Bushbuck | BUS210 | 0.002 | 1 | 3/14/15 | 36.91 | 0.32 | 81126  |
| 103 | Bushbuck | BUS201 | 0.001 | 1 | 3/5/15  | 36.91 | 0.32 | 21836  |
| 104 | Bushbuck | LM0044 | 0.000 | 0 | 7/16/16 | 36.91 | 0.32 | 12101  |
| 105 | Camel    | CAM219 | 0.003 | 1 | 3/8/15  | 36.89 | 0.31 | 66029  |
| 106 | Camel    | CAM216 | 0.002 | 1 | 3/8/15  | 36.89 | 0.31 | 98046  |
| 107 | Camel    | CAM218 | 0.002 | 1 | 3/8/15  | 36.89 | 0.31 | 77558  |
| 108 | Camel    | CAM102 | 0.001 | 1 | 11/1/14 | 36.92 | 0.37 | 69759  |
| 109 | Camel    | CAM203 | 0.001 | 1 | 3/5/15  | 36.89 | 0.31 | 66613  |

|     |        |        |       |   |         |       |      |        |
|-----|--------|--------|-------|---|---------|-------|------|--------|
| 110 | Camel  | CAM205 | 0.001 | 1 | 3/5/15  | 36.89 | 0.31 | 76791  |
| 111 | Camel  | CAM206 | 0.001 | 1 | 3/5/15  | 36.89 | 0.31 | 81364  |
| 112 | Camel  | CAM210 | 0.001 | 1 | 3/5/15  | 36.89 | 0.31 | 66523  |
| 113 | Camel  | CAM211 | 0.001 | 1 | 3/5/15  | 36.89 | 0.31 | 7861   |
| 114 | Camel  | CAM212 | 0.001 | 1 | 3/5/15  | 36.89 | 0.31 | 11180  |
| 115 | Camel  | CAM215 | 0.001 | 1 | 3/8/15  | 36.89 | 0.31 | 56941  |
| 116 | Camel  | CAM217 | 0.001 | 1 | 3/8/15  | 36.89 | 0.31 | 59030  |
| 117 | Camel  | CAM101 | 0.000 | 0 | 11/1/14 | 36.92 | 0.37 | 81693  |
| 118 | Camel  | CAM103 | 0.000 | 0 | 11/1/14 | 36.92 | 0.37 | 69534  |
| 119 | Camel  | CAM104 | 0.000 | 0 | 11/1/14 | 36.92 | 0.37 | 68053  |
| 120 | Camel  | CAM105 | 0.000 | 0 | 11/1/14 | 36.92 | 0.37 | 94787  |
| 121 | Camel  | CAM106 | 0.000 | 0 | 11/1/14 | 36.92 | 0.37 | 69247  |
| 122 | Camel  | CAM107 | 0.000 | 0 | 11/1/14 | 36.92 | 0.37 | 70137  |
| 123 | Camel  | CAM108 | 0.000 | 0 | 11/1/14 | 36.92 | 0.37 | 63481  |
| 124 | Camel  | CAM109 | 0.000 | 0 | 11/1/14 | 36.92 | 0.37 | 115286 |
| 125 | Camel  | CAM110 | 0.000 | 0 | 11/1/14 | 36.92 | 0.37 | 98547  |
| 126 | Camel  | CAM111 | 0.000 | 0 | 11/1/14 | 36.92 | 0.37 | 112487 |
| 127 | Camel  | CAM112 | 0.000 | 0 | 11/1/14 | 36.92 | 0.37 | 109875 |
| 128 | Camel  | CAM201 | 0.000 | 0 | 3/5/15  | 36.89 | 0.31 | 72376  |
| 129 | Camel  | CAM202 | 0.000 | 0 | 3/5/15  | 36.89 | 0.31 | 61271  |
| 130 | Camel  | CAM204 | 0.000 | 0 | 3/5/15  | 36.89 | 0.31 | 71575  |
| 131 | Camel  | CAM207 | 0.000 | 0 | 3/5/15  | 36.89 | 0.31 | 94184  |
| 132 | Camel  | CAM208 | 0.000 | 0 | 3/5/15  | 36.89 | 0.31 | 106266 |
| 133 | Camel  | CAM209 | 0.000 | 0 | 3/5/15  | 36.89 | 0.31 | 100729 |
| 134 | Camel  | CAM213 | 0.000 | 0 | 3/5/15  | 36.89 | 0.31 | 12321  |
| 135 | Camel  | CAM214 | 0.000 | 0 | 3/5/15  | 36.89 | 0.31 | 8332   |
| 136 | Camel  | CAM220 | 0.000 | 0 | 3/8/15  | 36.89 | 0.31 | 120540 |
| 137 | Camel  | LM0195 | 0.000 | 0 | 7/24/16 | 36.91 | 0.37 | 60678  |
| 138 | Camel  | LM0196 | 0.000 | 0 | 7/24/16 | 36.91 | 0.37 | 33809  |
| 139 | Camel  | LM0197 | 0.000 | 0 | 7/24/16 | 36.91 | 0.37 | 51926  |
| 140 | Camel  | LM0198 | 0.000 | 0 | 7/24/16 | 36.91 | 0.37 | 143769 |
| 141 | Camel  | LM0199 | 0.000 | 0 | 7/24/16 | 36.91 | 0.37 | 9549   |
| 142 | Camel  | LM0201 | 0.000 | 0 | 7/24/16 | 36.91 | 0.37 | 239607 |
| 143 | Camel  | WAT201 | 0.000 | 0 | 3/5/15  | 36.90 | 0.30 | 6186   |
| 144 | Cattle | COW250 | 0.005 | 1 | 3/11/15 | 36.87 | 0.33 | 4849   |
| 145 | Cattle | COW227 | 0.004 | 1 | 3/7/15  | 36.90 | 0.35 | 17691  |
| 146 | Cattle | COW251 | 0.004 | 1 | 3/11/15 | 36.87 | 0.33 | 5298   |
| 147 | Cattle | COW256 | 0.004 | 1 | 3/11/15 | 36.87 | 0.33 | 10091  |
| 148 | Cattle | COW229 | 0.003 | 1 | 3/7/15  | 36.90 | 0.35 | 17463  |

|     |        |        |       |   |          |       |      |        |
|-----|--------|--------|-------|---|----------|-------|------|--------|
| 149 | Cattle | COW205 | 0.002 | 1 | 3/7/15   | 36.90 | 0.38 | 172622 |
| 150 | Cattle | COW209 | 0.002 | 1 | 3/7/15   | 36.88 | 0.38 | 125891 |
| 151 | Cattle | COW211 | 0.002 | 1 | 3/7/15   | 36.88 | 0.38 | 153238 |
| 152 | Cattle | COW212 | 0.002 | 1 | 3/7/15   | 36.88 | 0.38 | 106837 |
| 153 | Cattle | COW214 | 0.002 | 1 | 3/7/15   | 36.88 | 0.38 | 40462  |
| 154 | Cattle | COW215 | 0.002 | 1 | 3/7/15   | 36.88 | 0.38 | 59030  |
| 155 | Cattle | COW216 | 0.002 | 1 | 3/7/15   | 36.88 | 0.38 | 81572  |
| 156 | Cattle | COW217 | 0.002 | 1 | 3/7/15   | 36.88 | 0.38 | 151429 |
| 157 | Cattle | COW238 | 0.002 | 1 | 3/7/15   | 36.90 | 0.31 | 84112  |
| 158 | Cattle | COW239 | 0.002 | 1 | 3/7/15   | 36.90 | 0.31 | 66536  |
| 159 | Cattle | COW255 | 0.002 | 1 | 3/11/15  | 36.87 | 0.33 | 7194   |
| 160 | Cattle | COW29  | 0.002 | 1 | 7/4/13   | 36.90 | 0.44 | 8845   |
| 161 | Cattle | COW101 | 0.001 | 1 | 10/31/14 | 36.87 | 0.33 | 56407  |
| 162 | Cattle | COW103 | 0.001 | 1 | 10/31/14 | 36.87 | 0.33 | 31634  |
| 163 | Cattle | COW104 | 0.001 | 1 | 10/31/14 | 36.87 | 0.33 | 72921  |
| 164 | Cattle | COW120 | 0.001 | 1 | 11/1/14  | 36.88 | 0.38 | 49026  |
| 165 | Cattle | COW207 | 0.001 | 1 | 3/7/15   | 36.90 | 0.38 | 120264 |
| 166 | Cattle | COW208 | 0.001 | 1 | 3/7/15   | 36.90 | 0.38 | 159841 |
| 167 | Cattle | COW210 | 0.001 | 1 | 3/7/15   | 36.88 | 0.38 | 97421  |
| 168 | Cattle | COW213 | 0.001 | 1 | 3/7/15   | 36.88 | 0.38 | 92688  |
| 169 | Cattle | COW219 | 0.001 | 1 | 3/7/15   | 36.86 | 0.37 | 85202  |
| 170 | Cattle | COW231 | 0.001 | 1 | 3/7/15   | 36.90 | 0.35 | 92474  |
| 171 | Cattle | COW236 | 0.001 | 1 | 3/7/15   | 36.90 | 0.31 | 81775  |
| 172 | Cattle | COW244 | 0.001 | 1 | 3/7/15   | 36.88 | 0.31 | 69246  |
| 173 | Cattle | COW253 | 0.001 | 1 | 3/11/15  | 36.87 | 0.33 | 12153  |
| 174 | Cattle | COW254 | 0.001 | 1 | 3/11/15  | 36.87 | 0.33 | 19158  |
| 175 | Cattle | COW31  | 0.001 | 1 | 7/5/13   | 36.85 | 0.43 | 11710  |
| 176 | Cattle | BUF21  | 0.000 | 0 | 7/10/13  | 36.88 | 0.33 | 22286  |
| 177 | Cattle | BUF22  | 0.000 | 0 | 7/10/13  | 36.88 | 0.33 | 17217  |
| 178 | Cattle | COW01  | 0.000 | 0 | 7/2/13   | 36.91 | 0.37 | 9814   |
| 179 | Cattle | COW02  | 0.000 | 0 | 7/2/13   | 36.91 | 0.37 | 9740   |
| 180 | Cattle | COW03  | 0.000 | 0 | 7/2/13   | 36.91 | 0.37 | 14586  |
| 181 | Cattle | COW04  | 0.000 | 0 | 7/2/13   | 36.91 | 0.37 | 7201   |
| 182 | Cattle | COW05  | 0.000 | 0 | 7/2/13   | 36.91 | 0.37 | 8462   |
| 183 | Cattle | COW06  | 0.000 | 0 | 7/2/13   | 36.91 | 0.37 | 5756   |
| 184 | Cattle | COW07  | 0.000 | 0 | 7/2/13   | 36.91 | 0.37 | 6086   |
| 185 | Cattle | COW08  | 0.000 | 0 | 7/2/13   | 36.91 | 0.37 | 7004   |
| 186 | Cattle | COW09  | 0.000 | 0 | 7/2/13   | 36.91 | 0.37 | 7266   |
| 187 | Cattle | COW10  | 0.000 | 0 | 7/2/13   | 36.91 | 0.37 | 12204  |

|     |        |          |       |   |          |       |      |        |
|-----|--------|----------|-------|---|----------|-------|------|--------|
| 188 | Cattle | COW102   | 0.000 | 0 | 10/31/14 | 36.87 | 0.33 | 63746  |
| 189 | Cattle | COW105   | 0.000 | 0 | 10/31/14 | 36.87 | 0.33 | 89986  |
| 190 | Cattle | COW106   | 0.000 | 0 | 11/1/14  | 36.91 | 0.36 | 43687  |
| 191 | Cattle | COW107   | 0.000 | 0 | 11/1/14  | 36.91 | 0.36 | 96485  |
| 192 | Cattle | COW108   | 0.000 | 0 | 11/1/14  | 36.91 | 0.36 | 14627  |
| 193 | Cattle | COW109   | 0.000 | 0 | 11/1/14  | 36.91 | 0.36 | 105715 |
| 194 | Cattle | COW11    | 0.000 | 0 | 7/2/13   | 36.91 | 0.37 | 12246  |
| 195 | Cattle | COW111   | 0.000 | 0 | 11/1/14  | 36.91 | 0.36 | 115268 |
| 196 | Cattle | COW112   | 0.000 | 0 | 11/1/14  | 36.91 | 0.36 | 57977  |
| 197 | Cattle | COW113   | 0.000 | 0 | 11/1/14  | 36.91 | 0.36 | 49687  |
| 198 | Cattle | COW114   | 0.000 | 0 | 11/1/14  | 36.91 | 0.36 | 74310  |
| 199 | Cattle | COW115   | 0.000 | 0 | 11/1/14  | 36.91 | 0.36 | 36749  |
| 200 | Cattle | COW116   | 0.000 | 0 | 11/1/14  | 36.91 | 0.36 | 68968  |
| 201 | Cattle | COW117   | 0.000 | 0 | 11/1/14  | 36.87 | 0.33 | 47494  |
| 202 | Cattle | COW118   | 0.000 | 0 | 11/1/14  | 36.88 | 0.38 | 59991  |
| 203 | Cattle | COW119   | 0.000 | 0 | 11/1/14  | 36.88 | 0.38 | 53587  |
| 204 | Cattle | COW12    | 0.000 | 0 | 7/2/13   | 36.91 | 0.37 | 8403   |
| 205 | Cattle | COW121   | 0.000 | 0 | 11/1/14  | 36.88 | 0.38 | 60176  |
| 206 | Cattle | COW122   | 0.000 | 0 | 11/1/14  | 36.88 | 0.38 | 37387  |
| 207 | Cattle | COW123   | 0.000 | 0 | 11/1/14  | 36.88 | 0.38 | 47407  |
| 208 | Cattle | COW124   | 0.000 | 0 | 11/1/14  | 36.88 | 0.38 | 56019  |
| 209 | Cattle | COW125   | 0.000 | 0 | 11/1/14  | 36.88 | 0.38 | 61114  |
| 210 | Cattle | COW126_R | 0.000 | 0 | 11/1/14  | 36.88 | 0.38 | 31164  |
| 211 | Cattle | COW127_R | 0.000 | 0 | 11/1/14  | 36.90 | 0.38 | 31768  |
| 212 | Cattle | COW128_R | 0.000 | 0 | 11/1/14  | 36.90 | 0.38 | 36961  |
| 213 | Cattle | COW129_R | 0.000 | 0 | 11/1/14  | 36.90 | 0.38 | 23496  |
| 214 | Cattle | COW13    | 0.000 | 0 | 7/2/13   | 36.91 | 0.37 | 10010  |
| 215 | Cattle | COW130_R | 0.000 | 0 | 11/1/14  | 36.90 | 0.38 | 28137  |
| 216 | Cattle | COW131_R | 0.000 | 0 | 11/1/14  | 36.90 | 0.38 | 33257  |
| 217 | Cattle | COW132_R | 0.000 | 0 | 11/1/14  | 36.90 | 0.38 | 35976  |
| 218 | Cattle | COW133_R | 0.000 | 0 | 11/1/14  | 36.90 | 0.38 | 26661  |
| 219 | Cattle | COW134_R | 0.000 | 0 | 11/1/14  | 36.90 | 0.38 | 43682  |
| 220 | Cattle | COW14    | 0.000 | 0 | 7/2/13   | 36.91 | 0.37 | 15299  |
| 221 | Cattle | COW15    | 0.000 | 0 | 7/4/13   | 36.90 | 0.44 | 11841  |
| 222 | Cattle | COW16    | 0.000 | 0 | 7/4/13   | 36.90 | 0.44 | 10423  |
| 223 | Cattle | COW17    | 0.000 | 0 | 7/4/13   | 36.90 | 0.44 | 9667   |
| 224 | Cattle | COW18    | 0.000 | 0 | 7/4/13   | 36.90 | 0.44 | 11939  |
| 225 | Cattle | COW19    | 0.000 | 0 | 7/4/13   | 36.90 | 0.44 | 9615   |
| 226 | Cattle | COW20    | 0.000 | 0 | 7/4/13   | 36.90 | 0.44 | 9951   |



|     |        |        |       |   |         |       |      |        |
|-----|--------|--------|-------|---|---------|-------|------|--------|
| 227 | Cattle | COW201 | 0.000 | 0 | 3/7/15  | 36.90 | 0.38 | 91051  |
| 228 | Cattle | COW202 | 0.000 | 0 | 3/7/15  | 36.90 | 0.38 | 139375 |
| 229 | Cattle | COW203 | 0.000 | 0 | 3/7/15  | 36.90 | 0.38 | 113202 |
| 230 | Cattle | COW204 | 0.000 | 0 | 3/7/15  | 36.90 | 0.38 | 103923 |
| 231 | Cattle | COW206 | 0.000 | 0 | 3/7/15  | 36.90 | 0.38 | 102121 |
| 232 | Cattle | COW21  | 0.000 | 0 | 7/4/13  | 36.90 | 0.44 | 18783  |
| 233 | Cattle | COW218 | 0.000 | 0 | 3/7/15  | 36.86 | 0.37 | 119040 |
| 234 | Cattle | COW22  | 0.000 | 0 | 7/4/13  | 36.90 | 0.44 | 14751  |
| 235 | Cattle | COW220 | 0.000 | 0 | 3/7/15  | 36.86 | 0.37 | 63887  |
| 236 | Cattle | COW228 | 0.000 | 0 | 3/7/15  | 36.90 | 0.35 | 23062  |
| 237 | Cattle | COW23  | 0.000 | 0 | 7/4/13  | 36.90 | 0.44 | 11023  |
| 238 | Cattle | COW230 | 0.000 | 0 | 3/7/15  | 36.90 | 0.35 | 86892  |
| 239 | Cattle | COW232 | 0.000 | 0 | 3/7/15  | 36.90 | 0.35 | 91263  |
| 240 | Cattle | COW233 | 0.000 | 0 | 3/7/15  | 36.90 | 0.35 | 62723  |
| 241 | Cattle | COW234 | 0.000 | 0 | 3/7/15  | 36.90 | 0.31 | 79219  |
| 242 | Cattle | COW235 | 0.000 | 0 | 3/7/15  | 36.90 | 0.31 | 27241  |
| 243 | Cattle | COW237 | 0.000 | 0 | 3/7/15  | 36.90 | 0.31 | 84880  |
| 244 | Cattle | COW24  | 0.000 | 0 | 7/4/13  | 36.90 | 0.44 | 14939  |
| 245 | Cattle | COW240 | 0.000 | 0 | 3/7/15  | 36.90 | 0.31 | 133657 |
| 246 | Cattle | COW241 | 0.000 | 0 | 3/7/15  | 36.90 | 0.31 | 67342  |
| 247 | Cattle | COW242 | 0.000 | 0 | 3/7/15  | 36.88 | 0.31 | 83258  |
| 248 | Cattle | COW243 | 0.000 | 0 | 3/7/15  | 36.88 | 0.31 | 71803  |
| 249 | Cattle | COW245 | 0.000 | 0 | 3/7/15  | 36.88 | 0.31 | 77803  |
| 250 | Cattle | COW246 | 0.000 | 0 | 3/7/15  | 36.88 | 0.31 | 77237  |
| 251 | Cattle | COW247 | 0.000 | 0 | 3/7/15  | 36.88 | 0.31 | 79645  |
| 252 | Cattle | COW248 | 0.000 | 0 | 3/7/15  | 36.88 | 0.31 | 103568 |
| 253 | Cattle | COW249 | 0.000 | 0 | 3/7/15  | 36.88 | 0.31 | 96767  |
| 254 | Cattle | COW25  | 0.000 | 0 | 7/4/13  | 36.90 | 0.44 | 11037  |
| 255 | Cattle | COW252 | 0.000 | 0 | 3/11/15 | 36.87 | 0.33 | 6016   |
| 256 | Cattle | COW257 | 0.000 | 0 | 3/11/15 | 36.87 | 0.33 | 2951   |
| 257 | Cattle | COW26  | 0.000 | 0 | 7/4/13  | 36.90 | 0.44 | 11498  |
| 258 | Cattle | COW27  | 0.000 | 0 | 7/4/13  | 36.90 | 0.44 | 8138   |
| 259 | Cattle | COW28  | 0.000 | 0 | 7/4/13  | 36.90 | 0.44 | 10128  |
| 260 | Cattle | COW30  | 0.000 | 0 | 7/5/13  | 36.85 | 0.43 | 10508  |
| 261 | Cattle | COW32  | 0.000 | 0 | 7/5/13  | 36.85 | 0.43 | 8767   |
| 262 | Cattle | COW33  | 0.000 | 0 | 7/5/13  | 36.85 | 0.43 | 11919  |
| 263 | Cattle | COW34  | 0.000 | 0 | 7/5/13  | 36.85 | 0.43 | 10301  |
| 264 | Cattle | COW35  | 0.000 | 0 | 7/5/13  | 36.85 | 0.43 | 12863  |
| 265 | Cattle | COW36  | 0.000 | 0 | 7/5/13  | 36.85 | 0.43 | 9099   |

|     |        |        |       |   |         |       |      |        |
|-----|--------|--------|-------|---|---------|-------|------|--------|
| 266 | Cattle | COW37  | 0.000 | 0 | 7/5/13  | 36.85 | 0.43 | 7872   |
| 267 | Cattle | COW38  | 0.000 | 0 | 7/5/13  | 36.85 | 0.43 | 11761  |
| 268 | Cattle | COW39  | 0.000 | 0 | 7/5/13  | 36.85 | 0.43 | 8678   |
| 269 | Cattle | COW40  | 0.000 | 0 | 7/5/13  | 36.85 | 0.43 | 13399  |
| 270 | Cattle | COW41  | 0.000 | 0 | 7/5/13  | 36.85 | 0.43 | 19336  |
| 271 | Cattle | COW42  | 0.000 | 0 | 7/5/13  | 36.85 | 0.43 | 28395  |
| 272 | Cattle | COW43  | 0.000 | 0 | 7/5/13  | 36.85 | 0.43 | 13767  |
| 273 | Cattle | COW44  | 0.000 | 0 | 7/5/13  | 36.85 | 0.43 | 13675  |
| 274 | Cattle | COW45  | 0.000 | 0 | 7/10/13 | 36.88 | 0.50 | 7416   |
| 275 | Cattle | COW46  | 0.000 | 0 | 7/10/13 | 36.88 | 0.50 | 20786  |
| 276 | Cattle | COW47  | 0.000 | 0 | 7/10/13 | 36.88 | 0.50 | 21658  |
| 277 | Cattle | COW48  | 0.000 | 0 | 7/10/13 | 36.88 | 0.50 | 8557   |
| 278 | Cattle | COW49  | 0.000 | 0 | 7/10/13 | 36.88 | 0.50 | 8415   |
| 279 | Cattle | COW50  | 0.000 | 0 | 7/10/13 | 36.88 | 0.50 | 17570  |
| 280 | Cattle | LM0066 | 0.000 | 0 | 7/18/16 | 37.06 | 0.26 | 86074  |
| 281 | Cattle | LM0107 | 0.000 | 0 | 7/19/16 | 36.96 | 0.29 | 4551   |
| 282 | Cattle | LM0108 | 0.000 | 0 | 7/19/16 | 36.96 | 0.29 | 72156  |
| 283 | Cattle | LM0109 | 0.000 | 0 | 7/19/16 | 36.96 | 0.29 | 43971  |
| 284 | Cattle | LM0110 | 0.000 | 0 | 7/19/16 | 36.96 | 0.29 | 77921  |
| 285 | Cattle | LM0111 | 0.000 | 0 | 7/19/16 | 36.96 | 0.29 | 8590   |
| 286 | Cattle | LM0112 | 0.000 | 0 | 7/19/16 | 36.96 | 0.29 | 26110  |
| 287 | Cattle | LM0113 | 0.000 | 0 | 7/19/16 | 36.96 | 0.29 | 20211  |
| 288 | Cattle | LM0114 | 0.000 | 0 | 7/19/16 | 36.96 | 0.29 | 118925 |
| 289 | Cattle | LM0273 | 0.000 | 0 | 7/29/16 | 36.87 | 0.40 | 42287  |
| 290 | Cattle | LM0274 | 0.000 | 0 | 7/29/16 | 36.87 | 0.40 | 45140  |
| 291 | Cattle | LM0275 | 0.000 | 0 | 7/29/16 | 36.87 | 0.40 | 65786  |
| 292 | Cattle | LM0276 | 0.000 | 0 | 7/29/16 | 36.87 | 0.40 | 80276  |
| 293 | Cattle | LM0277 | 0.000 | 0 | 7/29/16 | 36.87 | 0.40 | 104170 |
| 294 | Cattle | LM0278 | 0.000 | 0 | 7/29/16 | 36.87 | 0.40 | 53990  |
| 295 | Cattle | LM0279 | 0.000 | 0 | 7/29/16 | 36.87 | 0.40 | 74433  |
| 296 | Cattle | LM0280 | 0.000 | 0 | 7/29/16 | 36.87 | 0.40 | 66763  |
| 297 | Cattle | LM0281 | 0.000 | 0 | 7/29/16 | 36.87 | 0.40 | 86735  |
| 298 | Cattle | LM0282 | 0.000 | 0 | 7/29/16 | 36.87 | 0.34 | 255893 |
| 299 | Cattle | LM0283 | 0.000 | 0 | 7/29/16 | 36.87 | 0.34 | 123351 |
| 300 | Cattle | LM0284 | 0.000 | 0 | 7/29/16 | 36.87 | 0.34 | 186171 |
| 301 | Cattle | LM0285 | 0.000 | 0 | 7/29/16 | 36.87 | 0.34 | 131744 |
| 302 | Cattle | LM0286 | 0.000 | 0 | 7/29/16 | 36.87 | 0.34 | 41423  |
| 303 | Cattle | LM0287 | 0.000 | 0 | 7/29/16 | 36.87 | 0.34 | 90497  |
| 304 | Cattle | LM0288 | 0.000 | 0 | 7/29/16 | 36.87 | 0.34 | 59815  |

|     |         |          |       |   |          |       |      |        |
|-----|---------|----------|-------|---|----------|-------|------|--------|
| 305 | Cattle  | LM0289   | 0.000 | 0 | 7/29/16  | 36.87 | 0.34 | 59079  |
| 306 | Cattle  | LM0290   | 0.000 | 0 | 7/29/16  | 36.87 | 0.34 | 131064 |
| 307 | Dik-Dik | DIK258   | 0.052 | 1 | 3/10/15  | 36.89 | 0.28 | 103109 |
| 308 | Dik-Dik | DIK206   | 0.044 | 1 | 3/9/15   | 36.89 | 0.28 | 166158 |
| 309 | Dik-Dik | DIK254   | 0.032 | 1 | 3/10/15  | 36.91 | 0.40 | 118908 |
| 310 | Dik-Dik | DIK205   | 0.029 | 1 | 3/9/15   | 36.89 | 0.28 | 152237 |
| 311 | Dik-Dik | DIK220_R | 0.026 | 1 | 3/9/15   | 36.91 | 0.40 | 23687  |
| 312 | Dik-Dik | DIK217_R | 0.024 | 1 | 3/9/15   | 36.91 | 0.40 | 165529 |
| 313 | Dik-Dik | DIK219_R | 0.024 | 1 | 3/9/15   | 36.91 | 0.40 | 17888  |
| 314 | Dik-Dik | DIK204   | 0.020 | 1 | 3/9/15   | 36.89 | 0.28 | 142103 |
| 315 | Dik-Dik | DIK246   | 0.014 | 1 | 3/10/15  | 36.91 | 0.40 | 93985  |
| 316 | Dik-Dik | DIK233   | 0.013 | 1 | 3/10/15  | 36.91 | 0.40 | 82033  |
| 317 | Dik-Dik | DIK226   | 0.011 | 1 | 3/10/15  | 36.89 | 0.28 | 113512 |
| 318 | Dik-Dik | DIK229   | 0.009 | 1 | 3/10/15  | 36.89 | 0.29 | 91317  |
| 319 | Dik-Dik | DIK235   | 0.009 | 1 | 3/10/15  | 36.90 | 0.28 | 50931  |
| 320 | Dik-Dik | DIK256   | 0.009 | 1 | 3/10/15  | 36.89 | 0.29 | 74530  |
| 321 | Dik-Dik | DIK234   | 0.006 | 1 | 3/10/15  | 36.90 | 0.28 | 34049  |
| 322 | Dik-Dik | DIK208   | 0.005 | 1 | 3/9/15   | 36.91 | 0.40 | 148974 |
| 323 | Dik-Dik | DIK250   | 0.005 | 1 | 3/10/15  | 36.89 | 0.29 | 55045  |
| 324 | Dik-Dik | DIK255   | 0.005 | 1 | 3/10/15  | 36.91 | 0.40 | 112926 |
| 325 | Dik-Dik | DIK203   | 0.004 | 1 | 3/8/15   | 36.87 | 0.37 | 227339 |
| 326 | Dik-Dik | DIK216_R | 0.004 | 1 | 3/9/15   | 36.91 | 0.40 | 102678 |
| 327 | Dik-Dik | DIK251   | 0.004 | 1 | 3/10/15  | 36.89 | 0.29 | 71864  |
| 328 | Dik-Dik | DIK123   | 0.003 | 1 | 11/3/14  | 36.91 | 0.40 | 35759  |
| 329 | Dik-Dik | DIK133   | 0.003 | 1 | 11/3/14  | 36.91 | 0.40 | 53981  |
| 330 | Dik-Dik | DIK201   | 0.003 | 1 | 3/4/15   | 36.92 | 0.37 | 86993  |
| 331 | Dik-Dik | DIK207   | 0.003 | 1 | 3/9/15   | 36.91 | 0.40 | 179473 |
| 332 | Dik-Dik | DIK218_R | 0.003 | 1 | 3/9/15   | 36.91 | 0.40 | 100256 |
| 333 | Dik-Dik | DIK247   | 0.003 | 1 | 3/10/15  | 36.91 | 0.40 | 32501  |
| 334 | Dik-Dik | DIK263   | 0.003 | 1 | 3/14/15  | 36.91 | 0.33 | 46888  |
| 335 | Dik-Dik | DIK109   | 0.002 | 1 | 10/31/14 | 36.89 | 0.28 | 129525 |
| 336 | Dik-Dik | DIK114   | 0.002 | 1 | 11/3/14  | 36.91 | 0.40 | 117594 |
| 337 | Dik-Dik | DIK116   | 0.002 | 1 | 11/3/14  | 36.91 | 0.40 | 66257  |
| 338 | Dik-Dik | DIK137   | 0.002 | 1 | 11/3/14  | 36.89 | 0.29 | 75765  |
| 339 | Dik-Dik | DIK20    | 0.002 | 1 | 6/26/13  | 36.87 | 0.42 | 17473  |
| 340 | Dik-Dik | DIK202   | 0.002 | 1 | 3/8/15   | 36.87 | 0.38 | 192372 |
| 341 | Dik-Dik | DIK259   | 0.002 | 1 | 3/14/15  | 36.91 | 0.32 | 180115 |
| 342 | Dik-Dik | DIK260   | 0.002 | 1 | 3/14/15  | 36.91 | 0.32 | 54677  |
| 343 | Dik-Dik | DIK262   | 0.002 | 1 | 3/14/15  | 36.91 | 0.33 | 26670  |

|     |         |          |       |   |          |       |      |        |
|-----|---------|----------|-------|---|----------|-------|------|--------|
| 344 | Dik-Dik | DIK37    | 0.002 | 1 | 7/11/13  | 36.86 | 0.46 | 9811   |
| 345 | Dik-Dik | DIK43    | 0.002 | 1 | 7/12/13  | 36.90 | 0.30 | 12521  |
| 346 | Dik-Dik | LM0232   | 0.002 | 1 | 7/27/16  | 36.91 | 0.32 | 17643  |
| 347 | Dik-Dik | LM0247   | 0.002 | 1 | 7/28/16  | 36.89 | 0.28 | 134304 |
| 348 | Dik-Dik | DIK107   | 0.001 | 1 | 10/31/14 | 36.89 | 0.28 | 42220  |
| 349 | Dik-Dik | DIK111   | 0.001 | 1 | 11/1/14  | 36.91 | 0.33 | 149141 |
| 350 | Dik-Dik | DIK115   | 0.001 | 1 | 11/3/14  | 36.91 | 0.40 | 127078 |
| 351 | Dik-Dik | DIK124   | 0.001 | 1 | 11/3/14  | 36.91 | 0.40 | 48369  |
| 352 | Dik-Dik | DIK132   | 0.001 | 1 | 11/3/14  | 36.91 | 0.40 | 56162  |
| 353 | Dik-Dik | DIK138   | 0.001 | 1 | 11/3/14  | 36.89 | 0.29 | 127517 |
| 354 | Dik-Dik | DIK139   | 0.001 | 1 | 11/3/14  | 36.89 | 0.29 | 77087  |
| 355 | Dik-Dik | DIK143_R | 0.001 | 1 | 11/4/14  | 36.90 | 0.28 | 38701  |
| 356 | Dik-Dik | DIK147   | 0.001 | 1 | 11/4/14  | 36.89 | 0.29 | 75596  |
| 357 | Dik-Dik | DIK22    | 0.001 | 1 | 6/27/13  | 36.93 | 0.37 | 41740  |
| 358 | Dik-Dik | DIK225_R | 0.001 | 1 | 3/10/15  | 36.91 | 0.40 | 18886  |
| 359 | Dik-Dik | DIK24    | 0.001 | 1 | 6/27/13  | 36.91 | 0.40 | 35132  |
| 360 | Dik-Dik | DIK248   | 0.001 | 1 | 3/10/15  | 36.91 | 0.40 | 51769  |
| 361 | Dik-Dik | DIK31    | 0.001 | 1 | 7/10/13  | 36.91 | 0.41 | 28683  |
| 362 | Dik-Dik | DIK35    | 0.001 | 1 | 7/10/13  | 36.87 | 0.48 | 11528  |
| 363 | Dik-Dik | DIK46    | 0.001 | 1 | 7/15/13  | 36.91 | 0.40 | 20499  |
| 364 | Dik-Dik | LM0216   | 0.001 | 1 | 7/25/16  | 36.88 | 0.40 | 44001  |
| 365 | Dik-Dik | LM0246   | 0.001 | 1 | 7/28/16  | 36.89 | 0.28 | 55403  |
| 366 | Dik-Dik | LM0270   | 0.001 | 1 | 7/29/16  | 36.88 | 0.29 | 14450  |
| 367 | Dik-Dik | DIK01    | 0.000 | 0 | 6/24/13  | 36.91 | 0.34 | 15790  |
| 368 | Dik-Dik | DIK02    | 0.000 | 0 | 6/24/13  | 36.91 | 0.34 | 20321  |
| 369 | Dik-Dik | DIK03    | 0.000 | 0 | 6/24/13  | 36.91 | 0.34 | 11352  |
| 370 | Dik-Dik | DIK04    | 0.000 | 0 | 6/24/13  | 36.89 | 0.28 | 28411  |
| 371 | Dik-Dik | DIK06    | 0.000 | 0 | 6/25/13  | 36.89 | 0.29 | 7645   |
| 372 | Dik-Dik | DIK07    | 0.000 | 0 | 6/25/13  | 36.87 | 0.36 | 13590  |
| 373 | Dik-Dik | DIK08    | 0.000 | 0 | 6/25/13  | 36.92 | 0.40 | 17206  |
| 374 | Dik-Dik | DIK09    | 0.000 | 0 | 6/25/13  | 36.90 | 0.37 | 6959   |
| 375 | Dik-Dik | DIK10    | 0.000 | 0 | 6/25/13  | 36.89 | 0.29 | 12720  |
| 376 | Dik-Dik | DIK101   | 0.000 | 0 | 10/28/14 | 36.91 | 0.40 | 56689  |
| 377 | Dik-Dik | DIK102   | 0.000 | 0 | 10/30/14 | 36.89 | 0.30 | 38817  |
| 378 | Dik-Dik | DIK103   | 0.000 | 0 | 10/30/14 | 36.89 | 0.30 | 54555  |
| 379 | Dik-Dik | DIK104   | 0.000 | 0 | 10/31/14 | 36.89 | 0.28 | 51561  |
| 380 | Dik-Dik | DIK105   | 0.000 | 0 | 10/31/14 | 36.89 | 0.28 | 44576  |
| 381 | Dik-Dik | DIK106   | 0.000 | 0 | 10/31/14 | 36.89 | 0.28 | 95204  |
| 382 | Dik-Dik | DIK108   | 0.000 | 0 | 10/31/14 | 36.89 | 0.28 | 123386 |

|     |         |        |       |   |         |       |      |        |
|-----|---------|--------|-------|---|---------|-------|------|--------|
| 383 | Dik-Dik | DIK11  | 0.000 | 0 | 6/25/13 | 36.88 | 0.30 | 12057  |
| 384 | Dik-Dik | DIK110 | 0.000 | 0 | 11/1/14 | 36.91 | 0.32 | 101214 |
| 385 | Dik-Dik | DIK112 | 0.000 | 0 | 11/1/14 | 36.91 | 0.33 | 107282 |
| 386 | Dik-Dik | DIK113 | 0.000 | 0 | 11/2/14 | 36.91 | 0.31 | 96852  |
| 387 | Dik-Dik | DIK12  | 0.000 | 0 | 6/25/13 | 36.88 | 0.30 | 24420  |
| 388 | Dik-Dik | DIK122 | 0.000 | 0 | 11/3/14 | 36.91 | 0.40 | 38990  |
| 389 | Dik-Dik | DIK13  | 0.000 | 0 | 6/25/13 | 36.88 | 0.30 | 37022  |
| 390 | Dik-Dik | DIK14  | 0.000 | 0 | 6/26/13 | 36.86 | 0.46 | 10940  |
| 391 | Dik-Dik | DIK141 | 0.000 | 0 | 11/4/14 | 36.90 | 0.28 | 62762  |
| 392 | Dik-Dik | DIK142 | 0.000 | 0 | 11/4/14 | 36.90 | 0.28 | 58374  |
| 393 | Dik-Dik | DIK15  | 0.000 | 0 | 6/26/13 | 36.87 | 0.45 | 12419  |
| 394 | Dik-Dik | DIK151 | 0.000 | 0 | 11/4/14 | 36.91 | 0.40 | 43569  |
| 395 | Dik-Dik | DIK152 | 0.000 | 0 | 11/4/14 | 36.91 | 0.40 | 82485  |
| 396 | Dik-Dik | DIK153 | 0.000 | 0 | 11/4/14 | 36.91 | 0.40 | 56883  |
| 397 | Dik-Dik | DIK154 | 0.000 | 0 | 11/4/14 | 36.91 | 0.40 | 65771  |
| 398 | Dik-Dik | DIK16  | 0.000 | 0 | 6/26/13 | 36.86 | 0.45 | 14216  |
| 399 | Dik-Dik | DIK17  | 0.000 | 0 | 6/26/13 | 36.86 | 0.45 | 9464   |
| 400 | Dik-Dik | DIK18  | 0.000 | 0 | 6/26/13 | 36.86 | 0.43 | 26085  |
| 401 | Dik-Dik | DIK19  | 0.000 | 0 | 6/26/13 | 36.87 | 0.43 | 25846  |
| 402 | Dik-Dik | DIK21  | 0.000 | 0 | 6/27/13 | 36.91 | 0.33 | 16243  |
| 403 | Dik-Dik | DIK23  | 0.000 | 0 | 6/27/13 | 36.91 | 0.40 | 8275   |
| 404 | Dik-Dik | DIK25  | 0.000 | 0 | 6/27/13 | 36.90 | 0.41 | 22682  |
| 405 | Dik-Dik | DIK26  | 0.000 | 0 | 6/27/13 | 36.87 | 0.38 | 21426  |
| 406 | Dik-Dik | DIK27  | 0.000 | 0 | 6/27/13 | 36.87 | 0.38 | 2485   |
| 407 | Dik-Dik | DIK28  | 0.000 | 0 | 6/28/13 | 36.92 | 0.36 | 24680  |
| 408 | Dik-Dik | DIK29  | 0.000 | 0 | 7/10/13 | 36.91 | 0.41 | 6854   |
| 409 | Dik-Dik | DIK30  | 0.000 | 0 | 7/10/13 | 36.91 | 0.41 | 14501  |
| 410 | Dik-Dik | DIK32  | 0.000 | 0 | 7/10/13 | 36.86 | 0.47 | 50414  |
| 411 | Dik-Dik | DIK33  | 0.000 | 0 | 7/10/13 | 36.86 | 0.47 | 15277  |
| 412 | Dik-Dik | DIK34  | 0.000 | 0 | 7/10/13 | 36.86 | 0.48 | 14259  |
| 413 | Dik-Dik | DIK36  | 0.000 | 0 | 7/11/13 | 36.86 | 0.44 | 7024   |
| 414 | Dik-Dik | DIK38  | 0.000 | 0 | 7/11/13 | 36.86 | 0.46 | 18089  |
| 415 | Dik-Dik | DIK39  | 0.000 | 0 | 7/11/13 | 36.86 | 0.46 | 6450   |
| 416 | Dik-Dik | DIK40  | 0.000 | 0 | 7/11/13 | 36.86 | 0.46 | 7760   |
| 417 | Dik-Dik | DIK41  | 0.000 | 0 | 7/11/13 | 36.86 | 0.48 | 19089  |
| 418 | Dik-Dik | DIK42  | 0.000 | 0 | 7/11/13 | 36.86 | 0.49 | 12738  |
| 419 | Dik-Dik | DIK44  | 0.000 | 0 | 7/14/13 | 36.91 | 0.40 | 24334  |
| 420 | Dik-Dik | DIK45  | 0.000 | 0 | 7/15/13 | 36.91 | 0.40 | 7666   |
| 421 | Dik-Dik | DIK47  | 0.000 | 0 | 7/15/13 | 36.91 | 0.40 | 12220  |

|     |         |        |       |   |          |       |      |        |
|-----|---------|--------|-------|---|----------|-------|------|--------|
| 422 | Dik-Dik | LM0010 | 0.000 | 0 | 7/15/16  | 36.89 | 0.29 | 179948 |
| 423 | Dik-Dik | LM0011 | 0.000 | 0 | 7/15/16  | 36.89 | 0.29 | 149921 |
| 424 | Dik-Dik | LM0233 | 0.000 | 0 | 7/27/16  | 36.91 | 0.32 | 244604 |
| 425 | Dik-Dik | LM0248 | 0.000 | 0 | 7/28/16  | 36.89 | 0.28 | 20902  |
| 426 | Dik-Dik | LM0269 | 0.000 | 0 | 7/29/16  | 36.88 | 0.29 | 39300  |
| 427 | Donkey  | DON202 | 0.002 | 1 | 3/11/15  | 36.87 | 0.33 | 13605  |
| 428 | Donkey  | DON201 | 0.001 | 1 | 3/11/15  | 36.87 | 0.33 | 15760  |
| 429 | Donkey  | DON203 | 0.001 | 1 | 3/12/15  | 36.87 | 0.33 | 11711  |
| 430 | Donkey  | DON101 | 0.000 | 0 | 10/31/14 | 36.88 | 0.33 | 44244  |
| 431 | Donkey  | DON102 | 0.000 | 0 | 10/31/14 | 36.88 | 0.33 | 31670  |
| 432 | Donkey  | DON103 | 0.000 | 0 | 10/31/14 | 36.88 | 0.33 | 45931  |
| 433 | Donkey  | DON104 | 0.000 | 0 | 10/31/14 | 36.88 | 0.33 | 29218  |
| 434 | Donkey  | DON105 | 0.000 | 0 | 10/31/14 | 36.88 | 0.33 | 64350  |
| 435 | Donkey  | DON106 | 0.000 | 0 | 10/31/14 | 36.88 | 0.33 | 39596  |
| 436 | Donkey  | DON107 | 0.000 | 0 | 10/31/14 | 36.88 | 0.33 | 70736  |
| 437 | Donkey  | DON108 | 0.000 | 0 | 10/31/14 | 36.88 | 0.33 | 14679  |
| 438 | Donkey  | DON109 | 0.000 | 0 | 10/31/14 | 36.88 | 0.33 | 20918  |
| 439 | Donkey  | DON204 | 0.000 | 0 | 3/12/15  | 36.87 | 0.33 | 13885  |
| 440 | Donkey  | DON205 | 0.000 | 0 | 3/12/15  | 36.87 | 0.33 | 9117   |
| 441 | Donkey  | DON206 | 0.000 | 0 | 3/12/15  | 36.87 | 0.33 | 12170  |
| 442 | Donkey  | DON207 | 0.000 | 0 | 3/12/15  | 36.87 | 0.33 | 15020  |
| 443 | Donkey  | DON208 | 0.000 | 0 | 3/12/15  | 36.87 | 0.33 | 16230  |
| 444 | Donkey  | DON209 | 0.000 | 0 | 3/12/15  | 36.87 | 0.33 | 9584   |
| 445 | Donkey  | DON210 | 0.000 | 0 | 3/12/15  | 36.87 | 0.33 | 15652  |
| 446 | Donkey  | LM0249 | 0.000 | 0 | 7/28/16  | 36.88 | 0.36 | 212929 |
| 447 | Donkey  | LM0250 | 0.000 | 0 | 7/28/16  | 36.88 | 0.36 | 29444  |
| 448 | Donkey  | LM0251 | 0.000 | 0 | 7/28/16  | 36.88 | 0.36 | 48046  |
| 449 | Donkey  | LM0252 | 0.000 | 0 | 7/28/16  | 36.88 | 0.36 | 107692 |
| 450 | Donkey  | LM0253 | 0.000 | 0 | 7/28/16  | 36.88 | 0.36 | 6490   |
| 451 | Donkey  | LM0254 | 0.000 | 0 | 7/28/16  | 36.88 | 0.36 | 119603 |
| 452 | Donkey  | LM0255 | 0.000 | 0 | 7/28/16  | 36.88 | 0.36 | 20718  |
| 453 | Donkey  | LM0256 | 0.000 | 0 | 7/28/16  | 36.88 | 0.36 | 77799  |
| 454 | Donkey  | LM0257 | 0.000 | 0 | 7/28/16  | 36.88 | 0.36 | 228162 |
| 455 | Donkey  | LM0258 | 0.000 | 0 | 7/28/16  | 36.88 | 0.36 | 95700  |
| 456 | Eland   | ELA201 | 0.007 | 1 | 3/3/15   | 36.88 | 0.29 | 17397  |
| 457 | Eland   | ELA202 | 0.005 | 1 | 3/3/15   | 36.88 | 0.29 | 9259   |
| 458 | Eland   | LM0134 | 0.002 | 1 | 7/20/16  | 36.91 | 0.31 | 30130  |
| 459 | Eland   | LM0204 | 0.002 | 1 | 7/25/16  | 36.88 | 0.39 | 143084 |
| 460 | Eland   | WHO104 | 0.002 | 1 | 10/30/14 | 36.89 | 0.30 | 38252  |

|     |       |        |       |   |          |       |      |        |
|-----|-------|--------|-------|---|----------|-------|------|--------|
| 461 | Eland | ELA107 | 0.001 | 1 | 10/30/14 | 36.87 | 0.28 | 29425  |
| 462 | Eland | ELA114 | 0.001 | 1 | 10/30/14 | 36.87 | 0.28 | 37216  |
| 463 | Eland | ELA115 | 0.001 | 1 | 11/2/14  | 36.89 | 0.28 | 28804  |
| 464 | Eland | ELA116 | 0.001 | 1 | 11/2/14  | 36.89 | 0.29 | 42562  |
| 465 | Eland | LM0179 | 0.001 | 1 | 7/23/16  | 36.91 | 0.31 | 11311  |
| 466 | Eland | ELA101 | 0.000 | 0 | 10/29/14 | 36.87 | 0.30 | 42430  |
| 467 | Eland | ELA102 | 0.000 | 0 | 10/30/14 | 36.87 | 0.28 | 61938  |
| 468 | Eland | ELA103 | 0.000 | 0 | 10/30/14 | 36.87 | 0.28 | 103176 |
| 469 | Eland | ELA104 | 0.000 | 0 | 10/30/14 | 36.87 | 0.28 | 62130  |
| 470 | Eland | ELA105 | 0.000 | 0 | 10/30/14 | 36.87 | 0.28 | 75452  |
| 471 | Eland | ELA106 | 0.000 | 0 | 10/30/14 | 36.87 | 0.28 | 59444  |
| 472 | Eland | ELA108 | 0.000 | 0 | 10/30/14 | 36.87 | 0.28 | 18628  |
| 473 | Eland | ELA109 | 0.000 | 0 | 10/30/14 | 36.87 | 0.28 | 38399  |
| 474 | Eland | ELA110 | 0.000 | 0 | 10/30/14 | 36.87 | 0.28 | 38686  |
| 475 | Eland | ELA111 | 0.000 | 0 | 10/30/14 | 36.87 | 0.28 | 40863  |
| 476 | Eland | ELA112 | 0.000 | 0 | 10/30/14 | 36.87 | 0.28 | 38643  |
| 477 | Eland | ELA113 | 0.000 | 0 | 10/30/14 | 36.87 | 0.28 | 74469  |
| 478 | Eland | ELA117 | 0.000 | 0 | 11/2/14  | 36.87 | 0.30 | 40020  |
| 479 | Eland | ELA118 | 0.000 | 0 | 11/2/14  | 36.87 | 0.30 | 40972  |
| 480 | Eland | ELA204 | 0.000 | 0 | 3/16/15  | 36.86 | 0.31 | 7578   |
| 481 | Eland | LM0146 | 0.000 | 0 | 7/21/16  | 36.90 | 0.34 | 61263  |
| 482 | Eland | LM0147 | 0.000 | 0 | 7/21/16  | 36.90 | 0.34 | 56778  |
| 483 | Eland | LM0205 | 0.000 | 0 | 7/25/16  | 36.88 | 0.39 | 121376 |
| 484 | Eland | LM0206 | 0.000 | 0 | 7/25/16  | 36.88 | 0.39 | 131729 |
| 485 | Eland | LM0207 | 0.000 | 0 | 7/25/16  | 36.88 | 0.39 | 4730   |
| 486 | Eland | LM0208 | 0.000 | 0 | 7/25/16  | 36.88 | 0.39 | 115501 |
| 487 | Eland | LM0209 | 0.000 | 0 | 7/25/16  | 36.88 | 0.39 | 6599   |
| 488 | Eland | LM0210 | 0.000 | 0 | 7/25/16  | 36.88 | 0.39 | 110526 |
| 489 | Eland | LM0211 | 0.000 | 0 | 7/25/16  | 36.88 | 0.40 | 182910 |
| 490 | Eland | LM0237 | 0.000 | 0 | 7/28/16  | 36.96 | 0.31 | 6973   |
| 491 | Eland | LM0320 | 0.000 | 0 | 8/6/16   | 36.95 | 0.34 | 67700  |
| 492 | Eland | LM0321 | 0.000 | 0 | 8/6/16   | 36.95 | 0.34 | 52366  |
| 493 | Eland | LM0322 | 0.000 | 0 | 8/6/16   | 36.95 | 0.34 | 106519 |
| 494 | Eland | LM0323 | 0.000 | 0 | 8/6/16   | 36.95 | 0.34 | 50735  |
| 495 | Eland | LM0324 | 0.000 | 0 | 8/6/16   | 36.95 | 0.34 | 34544  |
| 496 | Eland | LM0325 | 0.000 | 0 | 8/6/16   | 36.95 | 0.34 | 94769  |
| 497 | Eland | LM0326 | 0.000 | 0 | 8/6/16   | 36.95 | 0.34 | 46716  |
| 498 | Eland | LM0327 | 0.000 | 0 | 8/6/16   | 36.95 | 0.34 | 19306  |
| 499 | Eland | LM0328 | 0.000 | 0 | 8/6/16   | 36.95 | 0.34 | 197644 |

|     |          |        |       |   |          |       |      |        |
|-----|----------|--------|-------|---|----------|-------|------|--------|
| 500 | Eland    | LM0329 | 0.000 | 0 | 8/6/16   | 36.95 | 0.34 | 100550 |
| 501 | Eland    | LM0330 | 0.000 | 0 | 8/6/16   | 36.95 | 0.34 | 117364 |
| 502 | Eland    | LM0331 | 0.000 | 0 | 8/6/16   | 36.95 | 0.34 | 68735  |
| 503 | Eland    | LM0332 | 0.000 | 0 | 8/6/16   | 36.95 | 0.34 | 92503  |
| 504 | Eland    | LM0333 | 0.000 | 0 | 8/6/16   | 36.95 | 0.34 | 70393  |
| 505 | Eland    | LM0334 | 0.000 | 0 | 8/6/16   | 36.95 | 0.34 | 16934  |
| 506 | Eland    | LM0335 | 0.000 | 0 | 8/6/16   | 36.95 | 0.34 | 91456  |
| 507 | Eland    | LM0336 | 0.000 | 0 | 8/6/16   | 36.95 | 0.34 | 77660  |
| 508 | Eland    | LM0341 | 0.000 | 0 | 8/6/16   | 36.93 | 0.29 | 55873  |
| 509 | Eland    | LM0342 | 0.000 | 0 | 8/6/16   | 36.93 | 0.29 | 22587  |
| 510 | Elephant | ELE211 | 0.037 | 1 | 3/7/15   | 36.92 | 0.38 | 54340  |
| 511 | Elephant | ELE204 | 0.019 | 1 | 3/4/15   | 36.92 | 0.35 | 30582  |
| 512 | Elephant | ELE215 | 0.011 | 1 | 3/10/15  | 36.91 | 0.32 | 15561  |
| 513 | Elephant | ELE224 | 0.010 | 1 | 3/13/15  | 36.90 | 0.38 | 60864  |
| 514 | Elephant | ELE101 | 0.006 | 1 | 10/26/14 | 36.89 | 0.36 | 114843 |
| 515 | Elephant | ELE216 | 0.006 | 1 | 3/13/15  | 36.92 | 0.36 | 19567  |
| 516 | Elephant | ELE104 | 0.005 | 1 | 10/29/14 | 36.91 | 0.30 | 118967 |
| 517 | Elephant | ELE210 | 0.005 | 1 | 3/7/15   | 36.91 | 0.41 | 56115  |
| 518 | Elephant | ELE225 | 0.005 | 1 | 3/15/15  | 36.88 | 0.39 | 38450  |
| 519 | Elephant | ELE203 | 0.004 | 1 | 3/3/15   | 36.87 | 0.34 | 23143  |
| 520 | Elephant | ELE202 | 0.003 | 1 | 3/3/15   | 36.87 | 0.34 | 20725  |
| 521 | Elephant | LM0054 | 0.003 | 1 | 7/18/16  | 37.01 | 0.29 | 146973 |
| 522 | Elephant | ELE106 | 0.002 | 1 | 10/31/14 | 36.89 | 0.29 | 125691 |
| 523 | Elephant | ELE11  | 0.002 | 1 | 6/26/13  | 36.87 | 0.42 | 14231  |
| 524 | Elephant | ELE201 | 0.002 | 1 | 3/1/15   | 36.91 | 0.34 | 22047  |
| 525 | Elephant | ELE205 | 0.002 | 1 | 3/7/15   | 36.91 | 0.29 | 18188  |
| 526 | Elephant | ELE212 | 0.002 | 1 | 3/7/15   | 36.92 | 0.38 | 41697  |
| 527 | Elephant | ELE213 | 0.002 | 1 | 3/7/15   | 36.92 | 0.38 | 27679  |
| 528 | Elephant | ELE223 | 0.002 | 1 | 3/11/15  | 36.88 | 0.35 | 126072 |
| 529 | Elephant | ELE226 | 0.002 | 1 | 3/16/15  | 36.88 | 0.29 | 71034  |
| 530 | Elephant | ELE227 | 0.002 | 1 | 3/16/15  | 36.86 | 0.28 | 37383  |
| 531 | Elephant | ELE228 | 0.002 | 1 | 3/17/15  | 36.87 | 0.33 | 14830  |
| 532 | Elephant | ELE36  | 0.002 | 1 | 7/12/13  | 36.91 | 0.34 | 36544  |
| 533 | Elephant | LM0023 | 0.002 | 1 | 7/15/16  | 36.91 | 0.34 | 116684 |
| 534 | Elephant | ELE102 | 0.001 | 1 | 10/26/14 | 36.88 | 0.35 | 92451  |
| 535 | Elephant | ELE108 | 0.001 | 1 | 10/31/14 | 36.89 | 0.29 | 93910  |
| 536 | Elephant | ELE113 | 0.001 | 1 | 11/4/14  | 36.91 | 0.33 | 161632 |
| 537 | Elephant | ELE18  | 0.001 | 1 | 6/28/13  | 36.88 | 0.35 | 12866  |
| 538 | Elephant | ELE20  | 0.001 | 1 | 6/28/13  | 36.91 | 0.33 | 9569   |



|     |          |        |       |   |          |       |      |        |
|-----|----------|--------|-------|---|----------|-------|------|--------|
| 539 | Elephant | ELE206 | 0.001 | 1 | 3/7/15   | 36.91 | 0.29 | 28379  |
| 540 | Elephant | ELE207 | 0.001 | 1 | 3/7/15   | 36.91 | 0.30 | 22848  |
| 541 | Elephant | ELE218 | 0.001 | 1 | 3/13/15  | 36.93 | 0.36 | 22221  |
| 542 | Elephant | ELE22  | 0.001 | 1 | 6/28/13  | 36.91 | 0.33 | 12281  |
| 543 | Elephant | ELE220 | 0.001 | 1 | 3/13/15  | 36.93 | 0.36 | 20811  |
| 544 | Elephant | ELE221 | 0.001 | 1 | 3/13/15  | 36.93 | 0.37 | 103259 |
| 545 | Elephant | ELE222 | 0.001 | 1 | 3/13/15  | 36.92 | 0.36 | 129358 |
| 546 | Elephant | LM0030 | 0.001 | 1 | 7/16/16  | 36.91 | 0.29 | 96302  |
| 547 | Elephant | ELE01  | 0.000 | 0 | 6/25/13  | 36.91 | 0.40 | 12126  |
| 548 | Elephant | ELE02  | 0.000 | 0 | 6/25/13  | 36.92 | 0.40 | 18104  |
| 549 | Elephant | ELE03  | 0.000 | 0 | 6/25/13  | 36.92 | 0.38 | 14879  |
| 550 | Elephant | ELE04  | 0.000 | 0 | 6/25/13  | 36.92 | 0.38 | 16761  |
| 551 | Elephant | ELE05  | 0.000 | 0 | 6/25/13  | 36.92 | 0.38 | 16616  |
| 552 | Elephant | ELE06  | 0.000 | 0 | 6/25/13  | 36.92 | 0.38 | 21756  |
| 553 | Elephant | ELE07  | 0.000 | 0 | 6/26/13  | 36.85 | 0.42 | 13249  |
| 554 | Elephant | ELE08  | 0.000 | 0 | 6/26/13  | 36.85 | 0.43 | 18517  |
| 555 | Elephant | ELE09  | 0.000 | 0 | 6/26/13  | 36.87 | 0.48 | 10524  |
| 556 | Elephant | ELE10  | 0.000 | 0 | 6/26/13  | 36.86 | 0.47 | 7508   |
| 557 | Elephant | ELE103 | 0.000 | 0 | 10/28/14 | 36.93 | 0.37 | 96585  |
| 558 | Elephant | ELE105 | 0.000 | 0 | 10/29/14 | 36.91 | 0.32 | 82729  |
| 559 | Elephant | ELE107 | 0.000 | 0 | 10/31/14 | 36.89 | 0.29 | 114448 |
| 560 | Elephant | ELE109 | 0.000 | 0 | 10/31/14 | 36.89 | 0.29 | 114080 |
| 561 | Elephant | ELE110 | 0.000 | 0 | 11/1/14  | 36.90 | 0.30 | 102621 |
| 562 | Elephant | ELE111 | 0.000 | 0 | 11/1/14  | 36.91 | 0.30 | 92979  |
| 563 | Elephant | ELE112 | 0.000 | 0 | 11/2/14  | 36.88 | 0.30 | 110853 |
| 564 | Elephant | ELE12  | 0.000 | 0 | 6/26/13  | 36.91 | 0.34 | 11043  |
| 565 | Elephant | ELE13  | 0.000 | 0 | 6/27/13  | 36.90 | 0.41 | 11952  |
| 566 | Elephant | ELE14  | 0.000 | 0 | 6/27/13  | 36.87 | 0.38 | 10911  |
| 567 | Elephant | ELE15  | 0.000 | 0 | 6/27/13  | 36.87 | 0.38 | 15552  |
| 568 | Elephant | ELE16  | 0.000 | 0 | 6/27/13  | 36.87 | 0.38 | 16929  |
| 569 | Elephant | ELE17  | 0.000 | 0 | 6/27/13  | 36.88 | 0.31 | 11763  |
| 570 | Elephant | ELE19  | 0.000 | 0 | 6/28/13  | 36.92 | 0.36 | 13004  |
| 571 | Elephant | ELE208 | 0.000 | 0 | 3/7/15   | 36.91 | 0.30 | 147558 |
| 572 | Elephant | ELE209 | 0.000 | 0 | 3/7/15   | 36.91 | 0.41 | 111725 |
| 573 | Elephant | ELE21  | 0.000 | 0 | 6/28/13  | 36.91 | 0.33 | 10136  |
| 574 | Elephant | ELE214 | 0.000 | 0 | 3/10/15  | 36.91 | 0.32 | 71361  |
| 575 | Elephant | ELE217 | 0.000 | 0 | 3/13/15  | 36.93 | 0.36 | 12944  |
| 576 | Elephant | ELE219 | 0.000 | 0 | 3/13/15  | 36.93 | 0.36 | 30025  |
| 577 | Elephant | ELE23  | 0.000 | 0 | 6/28/13  | 36.91 | 0.33 | 16145  |

|     |          |        |       |   |          |       |      |        |
|-----|----------|--------|-------|---|----------|-------|------|--------|
| 578 | Elephant | ELE24  | 0.000 | 0 | 6/28/13  | 36.91 | 0.33 | 11319  |
| 579 | Elephant | ELE25  | 0.000 | 0 | 6/28/13  | 36.91 | 0.33 | 17146  |
| 580 | Elephant | ELE26  | 0.000 | 0 | 6/29/13  | 36.89 | 0.28 | 12672  |
| 581 | Elephant | LM0001 | 0.000 | 0 | 7/14/16  | 36.91 | 0.32 | 25601  |
| 582 | Elephant | LM0002 | 0.000 | 0 | 7/14/16  | 36.91 | 0.33 | 24779  |
| 583 | Elephant | LM0021 | 0.000 | 0 | 7/15/16  | 36.88 | 0.36 | 183605 |
| 584 | Elephant | LM0024 | 0.000 | 0 | 7/15/16  | 36.91 | 0.34 | 316973 |
| 585 | Elephant | LM0031 | 0.000 | 0 | 7/16/16  | 36.91 | 0.30 | 171553 |
| 586 | Elephant | LM0032 | 0.000 | 0 | 7/16/16  | 36.91 | 0.30 | 151361 |
| 587 | Elephant | LM0101 | 0.000 | 0 | 7/19/16  | 36.96 | 0.36 | 73827  |
| 588 | Elephant | LM0102 | 0.000 | 0 | 7/19/16  | 36.96 | 0.36 | 32779  |
| 589 | Elephant | LM0260 | 0.000 | 0 | 7/29/16  | 36.89 | 0.35 | 38889  |
| 590 | Giraffe  | LM0217 | 0.025 | 1 | 7/25/16  | 36.88 | 0.40 | 5960   |
| 591 | Giraffe  | LM0212 | 0.012 | 1 | 7/25/16  | 36.88 | 0.40 | 40225  |
| 592 | Giraffe  | LM0214 | 0.012 | 1 | 7/25/16  | 36.88 | 0.40 | 4698   |
| 593 | Giraffe  | GIR220 | 0.009 | 1 | 3/16/15  | 36.90 | 0.30 | 44742  |
| 594 | Giraffe  | GIR202 | 0.008 | 1 | 3/1/15   | 36.91 | 0.31 | 81360  |
| 595 | Giraffe  | LM0143 | 0.008 | 1 | 7/21/16  | 36.90 | 0.34 | 19885  |
| 596 | Giraffe  | GIR203 | 0.007 | 1 | 3/1/15   | 36.88 | 0.36 | 5426   |
| 597 | Giraffe  | GIR217 | 0.007 | 1 | 3/15/15  | 36.89 | 0.33 | 91940  |
| 598 | Giraffe  | GIR201 | 0.005 | 1 | 3/1/15   | 36.90 | 0.36 | 8733   |
| 599 | Giraffe  | GIR206 | 0.005 | 1 | 3/8/15   | 36.88 | 0.35 | 117650 |
| 600 | Giraffe  | GIR207 | 0.005 | 1 | 3/10/15  | 36.87 | 0.35 | 57337  |
| 601 | Giraffe  | GIR210 | 0.005 | 1 | 3/10/15  | 36.87 | 0.35 | 17353  |
| 602 | Giraffe  | LM0142 | 0.005 | 1 | 7/21/16  | 36.90 | 0.34 | 28905  |
| 603 | Giraffe  | LM0213 | 0.005 | 1 | 7/25/16  | 36.88 | 0.40 | 27728  |
| 604 | Giraffe  | GIR116 | 0.004 | 1 | 11/3/14  | 36.89 | 0.37 | 16807  |
| 605 | Giraffe  | LM0022 | 0.004 | 1 | 7/15/16  | 36.91 | 0.30 | 263261 |
| 606 | Giraffe  | LM0152 | 0.004 | 1 | 7/22/16  | 36.91 | 0.32 | 197949 |
| 607 | Giraffe  | GIR111 | 0.003 | 1 | 11/2/14  | 36.90 | 0.38 | 88151  |
| 608 | Giraffe  | GIR204 | 0.003 | 1 | 3/8/15   | 36.88 | 0.35 | 50758  |
| 609 | Giraffe  | GIR209 | 0.003 | 1 | 3/10/15  | 36.87 | 0.35 | 30308  |
| 610 | Giraffe  | GIR221 | 0.003 | 1 | 3/16/15  | 36.90 | 0.30 | 32475  |
| 611 | Giraffe  | LM0259 | 0.003 | 1 | 7/29/16  | 36.89 | 0.35 | 88170  |
| 612 | Giraffe  | GIR109 | 0.002 | 1 | 10/31/14 | 36.89 | 0.30 | 44276  |
| 613 | Giraffe  | GIR205 | 0.002 | 1 | 3/8/15   | 36.88 | 0.35 | 117886 |
| 614 | Giraffe  | GIR208 | 0.002 | 1 | 3/10/15  | 36.87 | 0.35 | 31231  |
| 615 | Giraffe  | GIR212 | 0.002 | 1 | 3/14/15  | 36.91 | 0.31 | 67864  |
| 616 | Giraffe  | GIR215 | 0.002 | 1 | 3/15/15  | 36.89 | 0.33 | 21354  |

|     |         |        |       |   |          |       |      |        |
|-----|---------|--------|-------|---|----------|-------|------|--------|
| 617 | Giraffe | GIR216 | 0.002 | 1 | 3/15/15  | 36.89 | 0.33 | 38360  |
| 618 | Giraffe | LM0144 | 0.002 | 1 | 7/21/16  | 36.90 | 0.34 | 136088 |
| 619 | Giraffe | LM0337 | 0.002 | 1 | 8/6/16   | 36.94 | 0.34 | 79713  |
| 620 | Giraffe | GIR101 | 0.001 | 1 | 10/26/14 | 36.88 | 0.35 | 88368  |
| 621 | Giraffe | GIR103 | 0.001 | 1 | 10/26/14 | 36.88 | 0.35 | 92953  |
| 622 | Giraffe | GIR104 | 0.001 | 1 | 10/27/14 | 36.89 | 0.31 | 41040  |
| 623 | Giraffe | GIR108 | 0.001 | 1 | 10/30/14 | 36.90 | 0.29 | 38076  |
| 624 | Giraffe | GIR112 | 0.001 | 1 | 11/2/14  | 36.89 | 0.28 | 81947  |
| 625 | Giraffe | GIR213 | 0.001 | 1 | 3/14/15  | 36.91 | 0.32 | 44666  |
| 626 | Giraffe | GIR219 | 0.001 | 1 | 3/15/15  | 36.91 | 0.31 | 44047  |
| 627 | Giraffe | GIR102 | 0.000 | 0 | 10/26/14 | 36.88 | 0.35 | 131325 |
| 628 | Giraffe | GIR105 | 0.000 | 0 | 10/27/14 | 36.89 | 0.31 | 85352  |
| 629 | Giraffe | GIR106 | 0.000 | 0 | 10/27/14 | 36.89 | 0.31 | 77760  |
| 630 | Giraffe | GIR107 | 0.000 | 0 | 10/27/14 | 36.89 | 0.31 | 84216  |
| 631 | Giraffe | GIR110 | 0.000 | 0 | 10/31/14 | 36.89 | 0.30 | 73114  |
| 632 | Giraffe | GIR113 | 0.000 | 0 | 11/2/14  | 36.87 | 0.30 | 56635  |
| 633 | Giraffe | GIR114 | 0.000 | 0 | 11/2/14  | 36.87 | 0.30 | 53411  |
| 634 | Giraffe | GIR115 | 0.000 | 0 | 11/3/14  | 36.89 | 0.37 | 99997  |
| 635 | Giraffe | GIR211 | 0.000 | 0 | 3/14/15  | 36.91 | 0.31 | 13352  |
| 636 | Giraffe | GIR214 | 0.000 | 0 | 3/15/15  | 36.89 | 0.33 | 42069  |
| 637 | Giraffe | GIR218 | 0.000 | 0 | 3/15/15  | 36.91 | 0.31 | 48590  |
| 638 | Giraffe | LM0025 | 0.000 | 0 | 7/15/16  | 36.91 | 0.31 | 84152  |
| 639 | Giraffe | LM0124 | 0.000 | 0 | 7/20/16  | 36.94 | 0.28 | 146058 |
| 640 | Giraffe | LM0154 | 0.000 | 0 | 7/22/16  | 36.91 | 0.32 | 31428  |
| 641 | Giraffe | LM0313 | 0.000 | 0 | 8/6/16   | 36.96 | 0.31 | 60587  |
| 642 | Giraffe | LM0314 | 0.000 | 0 | 8/6/16   | 36.96 | 0.31 | 63091  |
| 643 | Giraffe | LM0315 | 0.000 | 0 | 8/6/16   | 36.96 | 0.31 | 52561  |
| 644 | Giraffe | LM0316 | 0.000 | 0 | 8/6/16   | 36.96 | 0.33 | 64904  |
| 645 | Giraffe | LM0317 | 0.000 | 0 | 8/6/16   | 36.96 | 0.33 | 47843  |
| 646 | Giraffe | LM0338 | 0.000 | 0 | 8/6/16   | 36.94 | 0.34 | 250866 |
| 647 | Giraffe | LM0339 | 0.000 | 0 | 8/6/16   | 36.94 | 0.34 | 170799 |
| 648 | Goat    | LM0185 | 0.003 | 1 | 7/24/16  | 36.87 | 0.36 | 114785 |
| 649 | Goat    | GOA201 | 0.002 | 1 | 3/7/15   | 36.89 | 0.32 | 31479  |
| 650 | Goat    | GOA101 | 0.001 | 1 |          | 36.87 | 0.34 | 56340  |
| 651 | Goat    | GOA202 | 0.001 | 1 | 3/7/15   | 36.89 | 0.32 | 12758  |
| 652 | Goat    | GOA203 | 0.001 | 1 | 3/7/15   | 36.89 | 0.32 | 20536  |
| 653 | Goat    | LM0177 | 0.001 | 1 | 7/22/16  | 36.90 | 0.32 | 19205  |
| 654 | Goat    | LM0182 | 0.001 | 1 | 7/24/16  | 36.87 | 0.36 | 16344  |
| 655 | Goat    | LM0186 | 0.001 | 1 | 7/24/16  | 36.87 | 0.36 | 2527   |

|     |               |        |       |   |          |       |      |        |
|-----|---------------|--------|-------|---|----------|-------|------|--------|
| 656 | Goat          | GOA102 | 0.000 | 0 |          | 36.87 | 0.34 | 77156  |
| 657 | Goat          | GOA103 | 0.000 | 0 |          | 36.87 | 0.34 | 42393  |
| 658 | Goat          | GOA204 | 0.000 | 0 | 3/16/15  | 36.89 | 0.32 | 15489  |
| 659 | Goat          | GOA205 | 0.000 | 0 | 3/16/15  | 36.89 | 0.32 | 2030   |
| 660 | Goat          | GOA206 | 0.000 | 0 | 3/16/15  | 36.89 | 0.32 | 14851  |
| 661 | Goat          | LM0175 | 0.000 | 0 | 7/22/16  | 36.90 | 0.32 | 145791 |
| 662 | Goat          | LM0176 | 0.000 | 0 | 7/22/16  | 36.90 | 0.32 | 4874   |
| 663 | Goat          | LM0178 | 0.000 | 0 | 7/22/16  | 36.90 | 0.32 | 34003  |
| 664 | Goat          | LM0183 | 0.000 | 0 | 7/24/16  | 36.87 | 0.36 | 466343 |
| 665 | Goat          | LM0184 | 0.000 | 0 | 7/24/16  | 36.87 | 0.36 | 32233  |
| 666 | Goat          | LM0308 | 0.000 | 0 | 8/3/16   | 36.88 | 0.36 | 94289  |
| 667 | Grevy's zebra | GRE202 | 0.004 | 1 | 3/2/15   | 36.90 | 0.37 | 23845  |
| 668 | Grevy's zebra | GRE228 | 0.002 | 1 | 3/17/15  | 36.88 | 0.28 | 46559  |
| 669 | Grevy's zebra | GRE201 | 0.001 | 1 | 3/1/15   | 36.89 | 0.29 | 24874  |
| 670 | Grevy's zebra | GRE205 | 0.001 | 1 | 3/4/15   | 36.89 | 0.35 | 14880  |
| 671 | Grevy's zebra | GRE207 | 0.001 | 1 | 3/4/15   | 36.91 | 0.32 | 23490  |
| 672 | Grevy's zebra | GRE208 | 0.001 | 1 | 3/7/15   | 36.92 | 0.40 | 17059  |
| 673 | Grevy's zebra | GRE215 | 0.001 | 1 | 3/13/15  | 36.92 | 0.38 | 9550   |
| 674 | Grevy's zebra | GRE223 | 0.001 | 1 | 3/15/15  | 36.89 | 0.28 | 51030  |
| 675 | Grevy's zebra | LM0048 | 0.001 | 1 | 7/17/16  | 36.90 | 0.30 | 40578  |
| 676 | Grevy's zebra | LM0225 | 0.001 | 1 | 7/26/16  | 36.91 | 0.33 | 7921   |
| 677 | Grevy's zebra | GRE01  | 0.000 | 0 | 6/24/13  |       |      | 3518   |
| 678 | Grevy's zebra | GRE02  | 0.000 | 0 | 6/26/13  | 36.88 | 0.31 | 7069   |
| 679 | Grevy's zebra | GRE03  | 0.000 | 0 | 6/27/13  | 36.88 | 0.31 | 4209   |
| 680 | Grevy's zebra | GRE04  | 0.000 | 0 | 6/27/13  | 36.90 | 0.30 | 8767   |
| 681 | Grevy's zebra | GRE05  | 0.000 | 0 | 6/27/13  | 36.90 | 0.30 | 6857   |
| 682 | Grevy's zebra | GRE06  | 0.000 | 0 | 6/27/13  | 36.90 | 0.30 | 4232   |
| 683 | Grevy's zebra | GRE07  | 0.000 | 0 | 6/27/13  | 36.90 | 0.30 | 15169  |
| 684 | Grevy's zebra | GRE08  | 0.000 | 0 | 6/28/13  | 36.88 | 0.31 | 4716   |
| 685 | Grevy's zebra | GRE09  | 0.000 | 0 | 6/28/13  | 36.88 | 0.31 | 6186   |
| 686 | Grevy's zebra | GRE10  | 0.000 | 0 | 6/28/13  | 36.88 | 0.31 | 7943   |
| 687 | Grevy's zebra | GRE101 | 0.000 | 0 | 10/27/14 | 36.89 | 0.36 | 41961  |
| 688 | Grevy's zebra | GRE102 | 0.000 | 0 | 10/27/14 | 36.89 | 0.36 | 43799  |
| 689 | Grevy's zebra | GRE103 | 0.000 | 0 | 10/28/14 | 36.92 | 0.38 | 46927  |
| 690 | Grevy's zebra | GRE104 | 0.000 | 0 | 10/29/14 | 36.88 | 0.28 | 50849  |
| 691 | Grevy's zebra | GRE105 | 0.000 | 0 | 11/2/14  | 36.89 | 0.35 | 33413  |
| 692 | Grevy's zebra | GRE106 | 0.000 | 0 | 11/2/14  | 36.90 | 0.30 | 63659  |
| 693 | Grevy's zebra | GRE107 | 0.000 | 0 | 11/3/14  | 36.91 | 0.34 | 37855  |
| 694 | Grevy's zebra | GRE108 | 0.000 | 0 | 11/3/14  | 36.91 | 0.34 | 58081  |

|     |               |         |       |   |         |       |      |       |
|-----|---------------|---------|-------|---|---------|-------|------|-------|
| 695 | Grevy's zebra | GRE109  | 0.000 | 0 | 11/3/14 | 36.91 | 0.34 | 63404 |
| 696 | Grevy's zebra | GRE110  | 0.000 | 0 | 11/3/14 | 36.91 | 0.34 | 2128  |
| 697 | Grevy's zebra | GRE111  | 0.000 | 0 | 11/3/14 | 36.91 | 0.34 | 27436 |
| 698 | Grevy's zebra | GRE112  | 0.000 | 0 | 11/3/14 | 36.92 | 0.37 | 27888 |
| 699 | Grevy's zebra | GRE113  | 0.000 | 0 | 11/3/14 | 36.92 | 0.37 | 81029 |
| 700 | Grevy's zebra | GRE114  | 0.000 | 0 | 11/3/14 | 36.92 | 0.37 | 56548 |
| 701 | Grevy's zebra | GRE115  | 0.000 | 0 | 11/3/14 | 36.89 | 0.37 | 51406 |
| 702 | Grevy's zebra | GRE116  | 0.000 | 0 | 11/3/14 | 36.88 | 0.31 | 40000 |
| 703 | Grevy's zebra | GRE15   | 0.000 | 0 | 7/2/13  | 36.92 | 0.38 | 5063  |
| 704 | Grevy's zebra | GRE16   | 0.000 | 0 | 7/2/13  | 36.92 | 0.38 | 10120 |
| 705 | Grevy's zebra | GRE17   | 0.000 | 0 | 7/2/13  | 36.92 | 0.38 | 9045  |
| 706 | Grevy's zebra | GRE203  | 0.000 | 0 | 3/2/15  | 36.89 | 0.36 | 18937 |
| 707 | Grevy's zebra | GRE204  | 0.000 | 0 | 3/4/15  | 36.90 | 0.35 | 21954 |
| 708 | Grevy's zebra | GRE206  | 0.000 | 0 | 3/4/15  | 36.89 | 0.36 | 24767 |
| 709 | Grevy's zebra | GRE209  | 0.000 | 0 | 3/7/15  | 36.92 | 0.40 | 24076 |
| 710 | Grevy's zebra | GRE21   | 0.000 | 0 | 7/4/13  | 36.92 | 0.37 | 7081  |
| 711 | Grevy's zebra | GRE210  | 0.000 | 0 | 3/7/15  | 36.92 | 0.40 | 17697 |
| 712 | Grevy's zebra | GRE211  | 0.000 | 0 | 3/10/15 | 36.89 | 0.37 | 8953  |
| 713 | Grevy's zebra | GRE212  | 0.000 | 0 | 3/13/15 | 36.92 | 0.39 | 10606 |
| 714 | Grevy's zebra | GRE213  | 0.000 | 0 | 3/13/15 | 36.92 | 0.38 | 12717 |
| 715 | Grevy's zebra | GRE214  | 0.000 | 0 | 3/13/15 | 36.92 | 0.38 | 9817  |
| 716 | Grevy's zebra | GRE216  | 0.000 | 0 | 3/11/15 | 36.86 | 0.30 | 11314 |
| 717 | Grevy's zebra | GRE217  | 0.000 | 0 | 3/13/15 | 36.87 | 0.30 | 12420 |
| 718 | Grevy's zebra | GRE218  | 0.000 | 0 | 3/13/15 | 36.87 | 0.30 | 11416 |
| 719 | Grevy's zebra | GRE219  | 0.000 | 0 | 3/13/15 | 36.88 | 0.29 | 12435 |
| 720 | Grevy's zebra | GRE22   | 0.000 | 0 | 7/4/13  | 36.90 | 0.29 | 5693  |
| 721 | Grevy's zebra | GRE220  | 0.000 | 0 | 3/14/15 | 36.87 | 0.32 | 10185 |
| 722 | Grevy's zebra | GRE221  | 0.000 | 0 | 3/14/15 | 36.87 | 0.32 | 35724 |
| 723 | Grevy's zebra | GRE222  | 0.000 | 0 | 3/14/15 | 36.87 | 0.32 | 68599 |
| 724 | Grevy's zebra | GRE224  | 0.000 | 0 | 3/15/15 | 36.89 | 0.28 | 44240 |
| 725 | Grevy's zebra | GRE225  | 0.000 | 0 | 3/16/15 | 36.90 | 0.29 | 52254 |
| 726 | Grevy's zebra | GRE226  | 0.000 | 0 | 3/16/15 | 36.88 | 0.29 | 35703 |
| 727 | Grevy's zebra | GRE227  | 0.000 | 0 | 3/16/15 | 36.88 | 0.30 | 64704 |
| 728 | Grevy's zebra | GRE229  | 0.000 | 0 | 3/17/15 | 36.88 | 0.28 | 59712 |
| 729 | Grevy's zebra | GRE23   | 0.000 | 0 | 7/4/13  | 36.90 | 0.29 | 10250 |
| 730 | Grevy's zebra | GRE230  | 0.000 | 0 | 3/18/15 | 36.86 | 0.32 | 48896 |
| 731 | Grevy's zebra | GRE24_R | 0.000 | 0 | 7/5/13  | 36.89 | 0.35 | 8169  |
| 732 | Grevy's zebra | GRE25_R | 0.000 | 0 | 7/8/13  | 36.88 | 0.36 | 8892  |
| 733 | Grevy's zebra | GRE26_R | 0.000 | 0 | 7/8/13  | 36.93 | 0.37 | 7895  |

|     |               |         |       |   |          |       |      |        |
|-----|---------------|---------|-------|---|----------|-------|------|--------|
| 734 | Grevy's zebra | GRE27_R | 0.000 | 0 | 7/9/13   | 36.89 | 0.31 | 2496   |
| 735 | Grevy's zebra | GRE28_R | 0.000 | 0 | 7/10/13  | 36.86 | 0.44 | 5893   |
| 736 | Grevy's zebra | GRE29_R | 0.000 | 0 | 7/10/13  | 36.86 | 0.44 | 3609   |
| 737 | Grevy's zebra | GRE30_R | 0.000 | 0 | 7/10/13  | 36.86 | 0.44 | 3431   |
| 738 | Grevy's zebra | GRE31_R | 0.000 | 0 | 7/10/13  | 36.86 | 0.44 | 4031   |
| 739 | Grevy's zebra | GRE32_R | 0.000 | 0 | 7/10/13  | 36.91 | 0.34 | 8564   |
| 740 | Grevy's zebra | GRE33_R | 0.000 | 0 | 7/11/13  | 36.86 | 0.44 | 5438   |
| 741 | Grevy's zebra | GRE34_R | 0.000 | 0 | 7/12/13  | 36.88 | 0.31 | 6683   |
| 742 | Grevy's zebra | GRE35_R | 0.000 | 0 | 7/12/13  | 36.90 | 0.35 | 5207   |
| 743 | Grevy's zebra | GRE36_R | 0.000 | 0 | 7/12/13  | 36.89 | 0.36 | 5110   |
| 744 | Grevy's zebra | GRE37_R | 0.000 | 0 | 7/13/13  | 36.92 | 0.39 | 5084   |
| 745 | Grevy's zebra | GRE38_R | 0.000 | 0 | 7/14/13  | 36.92 | 0.38 | 10259  |
| 746 | Grevy's zebra | GRE39_R | 0.000 | 0 | 7/14/13  |       |      | 4467   |
| 747 | Grevy's zebra | GRE40_R | 0.000 | 0 | 7/14/13  |       |      | 6692   |
| 748 | Grevy's zebra | GRE41_R | 0.000 | 0 | 7/14/13  |       |      | 7185   |
| 749 | Grevy's zebra | GRE42_R | 0.000 | 0 | 7/14/13  |       |      | 9244   |
| 750 | Grevy's zebra | LM0009  | 0.000 | 0 | 7/15/16  | 36.89 | 0.29 | 99253  |
| 751 | Grevy's zebra | LM0049  | 0.000 | 0 | 7/17/16  | 36.90 | 0.30 | 83760  |
| 752 | Grevy's zebra | LM0106  | 0.000 | 0 | 7/19/16  | 36.97 | 0.33 | 43596  |
| 753 | Grevy's zebra | LM0218  | 0.000 | 0 | 7/25/16  | 36.89 | 0.41 | 156448 |
| 754 | Grevy's zebra | LM0223  | 0.000 | 0 | 7/26/16  | 36.91 | 0.33 | 95365  |
| 755 | Grevy's zebra | LM0224  | 0.000 | 0 | 7/26/16  | 36.91 | 0.33 | 17400  |
| 756 | Grevy's zebra | LM0226  | 0.000 | 0 | 7/26/16  | 36.91 | 0.33 | 123654 |
| 757 | Grevy's zebra | UNZ01   | 0.000 | 0 | 6/28/13  | 36.89 | 0.28 | 5685   |
| 758 | Hartebeest    | HAR215  | 0.002 | 1 | 3/17/15  | 36.88 | 0.31 | 12722  |
| 759 | Hartebeest    | HAR202  | 0.001 | 1 | 3/6/15   | 36.87 | 0.27 | 5826   |
| 760 | Hartebeest    | HAR210  | 0.001 | 1 | 3/16/15  | 36.88 | 0.34 | 22236  |
| 761 | Hartebeest    | HAR216  | 0.001 | 1 | 3/18/15  | 36.86 | 0.27 | 16138  |
| 762 | Hartebeest    | HAR101A | 0.000 | 0 | 10/31/14 | 36.88 | 0.36 | 75916  |
| 763 | Hartebeest    | HAR102  | 0.000 | 0 | 11/2/14  | 36.88 | 0.35 | 104415 |
| 764 | Hartebeest    | HAR106  | 0.000 | 0 | 11/3/14  | 36.89 | 0.37 | 47944  |
| 765 | Hartebeest    | HAR107  | 0.000 | 0 | 11/3/14  | 36.89 | 0.37 | 51635  |
| 766 | Hartebeest    | HAR108  | 0.000 | 0 | 11/3/14  | 36.89 | 0.37 | 40688  |
| 767 | Hartebeest    | HAR109  | 0.000 | 0 | 11/3/14  | 36.89 | 0.37 | 26938  |
| 768 | Hartebeest    | HAR110  | 0.000 | 0 | 11/4/14  | 36.88 | 0.36 | 53907  |
| 769 | Hartebeest    | HAR111  | 0.000 | 0 | 11/4/14  | 36.87 | 0.36 | 39381  |
| 770 | Hartebeest    | HAR201  | 0.000 | 0 | 3/3/15   | 36.88 | 0.34 | 4112   |
| 771 | Hartebeest    | HAR203  | 0.000 | 0 | 3/15/15  | 36.88 | 0.35 | 5126   |
| 772 | Hartebeest    | HAR204  | 0.000 | 0 | 3/15/15  | 36.88 | 0.35 | 4455   |

|     |            |        |       |   |         |       |      |        |
|-----|------------|--------|-------|---|---------|-------|------|--------|
| 773 | Hartebeest | HAR205 | 0.000 | 0 | 3/15/15 | 36.88 | 0.35 | 4702   |
| 774 | Hartebeest | HAR206 | 0.000 | 0 | 3/15/15 | 36.88 | 0.35 | 3435   |
| 775 | Hartebeest | HAR207 | 0.000 | 0 | 3/15/15 | 36.88 | 0.35 | 52402  |
| 776 | Hartebeest | HAR208 | 0.000 | 0 | 3/16/15 | 36.87 | 0.28 | 75030  |
| 777 | Hartebeest | HAR209 | 0.000 | 0 | 3/16/15 | 36.87 | 0.28 | 12889  |
| 778 | Hartebeest | HAR211 | 0.000 | 0 | 3/16/15 | 36.88 | 0.35 | 14967  |
| 779 | Hartebeest | HAR212 | 0.000 | 0 | 3/16/15 | 36.88 | 0.35 | 12282  |
| 780 | Hartebeest | HAR213 | 0.000 | 0 | 3/16/15 | 36.88 | 0.35 | 16436  |
| 781 | Hartebeest | HAR214 | 0.000 | 0 | 3/16/15 | 36.88 | 0.35 | 14183  |
| 782 | Hartebeest | HAR217 | 0.000 | 0 | 3/18/15 | 36.86 | 0.27 | 15064  |
| 783 | Hartebeest | LM0304 | 0.000 | 0 | 8/2/16  | 36.90 | 0.35 | 114492 |
| 784 | Hartebeest | LM0305 | 0.000 | 0 | 8/2/16  | 36.90 | 0.35 | 89415  |
| 785 | Hippo      | HIP204 | 0.001 | 1 | 3/7/15  | 36.91 | 0.32 | 3144   |
| 786 | Hippo      | HIP207 | 0.001 | 1 | 3/12/15 | 36.91 | 0.32 | 66282  |
| 787 | Hippo      | HIP210 | 0.001 | 1 | 3/12/15 | 36.91 | 0.32 | 69650  |
| 788 | Hippo      | HIP216 | 0.001 | 1 | 3/18/15 | 36.91 | 0.32 | 43937  |
| 789 | Hippo      | LM0034 | 0.001 | 1 | 7/16/16 | 36.91 | 0.32 | 20069  |
| 790 | Hippo      | HIP201 | 0.000 | 0 | 3/2/15  | 36.91 | 0.34 | 3517   |
| 791 | Hippo      | HIP202 | 0.000 | 0 | 3/5/15  | 36.91 | 0.32 | 5742   |
| 792 | Hippo      | HIP203 | 0.000 | 0 | 3/7/15  | 36.91 | 0.32 | 5756   |
| 793 | Hippo      | HIP205 | 0.000 | 0 | 3/7/15  | 36.91 | 0.32 | 80147  |
| 794 | Hippo      | HIP206 | 0.000 | 0 | 3/12/15 | 36.91 | 0.32 | 74697  |
| 795 | Hippo      | HIP208 | 0.000 | 0 | 3/12/15 | 36.91 | 0.32 | 49658  |
| 796 | Hippo      | HIP209 | 0.000 | 0 | 3/12/15 | 36.91 | 0.32 | 29922  |
| 797 | Hippo      | HIP211 | 0.000 | 0 | 3/12/15 | 36.91 | 0.34 | 58864  |
| 798 | Hippo      | HIP212 | 0.000 | 0 | 3/12/15 | 36.91 | 0.34 | 89776  |
| 799 | Hippo      | HIP213 | 0.000 | 0 | 3/14/15 | 36.91 | 0.32 | 55503  |
| 800 | Hippo      | HIP214 | 0.000 | 0 | 3/18/15 | 36.91 | 0.32 | 35802  |
| 801 | Hippo      | HIP215 | 0.000 | 0 | 3/18/15 | 36.91 | 0.32 | 55179  |
| 802 | Hippo      | LM0033 | 0.000 | 0 | 7/16/16 | 36.91 | 0.32 | 20685  |
| 803 | Hippo      | LM0042 | 0.000 | 0 | 7/16/16 | 36.91 | 0.32 | 31212  |
| 804 | Hippo      | LM0043 | 0.000 | 0 | 7/16/16 | 36.91 | 0.32 | 40128  |
| 805 | Hippo      | LM0151 | 0.000 | 0 | 7/22/16 | 36.91 | 0.30 | 19335  |
| 806 | Hippo      | LM0300 | 0.000 | 0 | 7/26/16 | 36.88 | 0.31 | 134494 |
| 807 | Hippo      | LM0301 | 0.000 | 0 | 7/26/16 | 36.88 | 0.31 | 75927  |
| 808 | Impala     | IMP225 | 0.045 | 1 | 3/14/15 | 36.90 | 0.39 | 126480 |
| 809 | Impala     | IMP213 | 0.011 | 1 | 3/4/15  | 36.90 | 0.37 | 48666  |
| 810 | Impala     | IMP232 | 0.005 | 1 | 3/15/15 | 36.88 | 0.35 | 124954 |
| 811 | Impala     | IMP234 | 0.005 | 1 | 3/15/15 | 36.88 | 0.35 | 67539  |

|     |        |        |       |   |         |       |      |        |
|-----|--------|--------|-------|---|---------|-------|------|--------|
| 812 | Impala | IMP36  | 0.005 | 1 | 6/28/13 | 36.89 | 0.28 | 12091  |
| 813 | Impala | IMP218 | 0.004 | 1 | 3/8/15  | 36.92 | 0.38 | 122605 |
| 814 | Impala | IMP233 | 0.004 | 1 | 3/15/15 | 36.88 | 0.35 | 121277 |
| 815 | Impala | IMP235 | 0.004 | 1 | 3/16/15 | 36.88 | 0.35 | 50796  |
| 816 | Impala | IMP34  | 0.004 | 1 | 6/28/13 | 36.89 | 0.29 | 4680   |
| 817 | Impala | GGA215 | 0.003 | 1 | 3/13/15 | 36.89 | 0.37 | 8134   |
| 818 | Impala | IMP216 | 0.003 | 1 | 3/6/15  | 36.88 | 0.30 | 46882  |
| 819 | Impala | WHO204 | 0.003 | 1 | 3/16/15 | 36.88 | 0.35 | 166224 |
| 820 | Impala | IMP1   | 0.002 | 1 | 6/24/13 | 36.89 | 0.35 | 3863   |
| 821 | Impala | IMP203 | 0.002 | 1 | 3/2/15  | 36.92 | 0.36 | 59320  |
| 822 | Impala | IMP204 | 0.002 | 1 | 3/2/15  | 36.89 | 0.28 | 122712 |
| 823 | Impala | IMP207 | 0.002 | 1 | 3/3/15  | 36.92 | 0.35 | 105903 |
| 824 | Impala | IMP211 | 0.002 | 1 | 3/4/15  | 36.90 | 0.37 | 6259   |
| 825 | Impala | IMP212 | 0.002 | 1 | 3/4/15  | 36.90 | 0.37 | 83916  |
| 826 | Impala | IMP219 | 0.002 | 1 | 3/8/15  | 36.92 | 0.38 | 87921  |
| 827 | Impala | IMP223 | 0.002 | 1 | 3/14/15 | 36.91 | 0.34 | 7520   |
| 828 | Impala | IMP228 | 0.002 | 1 | 3/15/15 | 36.91 | 0.30 | 54006  |
| 829 | Impala | IMP230 | 0.002 | 1 | 3/15/15 | 36.91 | 0.32 | 73177  |
| 830 | Impala | IMP236 | 0.002 | 1 | 3/18/15 | 36.88 | 0.36 | 82397  |
| 831 | Impala | IMP37  | 0.002 | 1 | 6/28/13 | 36.89 | 0.28 | 5211   |
| 832 | Impala | IMP46  | 0.002 | 1 | 7/10/13 | 36.86 | 0.44 | 15297  |
| 833 | Impala | WHO205 | 0.002 | 1 | 3/16/15 | 36.88 | 0.35 | 130834 |
| 834 | Impala | IMP114 | 0.001 | 1 | 11/1/14 | 36.88 | 0.31 | 28089  |
| 835 | Impala | IMP124 | 0.001 | 1 | 11/3/14 | 36.90 | 0.38 | 65326  |
| 836 | Impala | IMP202 | 0.001 | 1 | 3/2/15  | 36.92 | 0.36 | 115142 |
| 837 | Impala | IMP205 | 0.001 | 1 | 3/2/15  | 36.88 | 0.29 | 97527  |
| 838 | Impala | IMP208 | 0.001 | 1 | 3/3/15  | 36.92 | 0.35 | 111430 |
| 839 | Impala | IMP209 | 0.001 | 1 | 3/3/15  | 36.88 | 0.35 | 73712  |
| 840 | Impala | IMP215 | 0.001 | 1 | 3/6/15  | 36.88 | 0.30 | 79380  |
| 841 | Impala | IMP224 | 0.001 | 1 | 3/14/15 | 36.91 | 0.34 | 4306   |
| 842 | Impala | IMP226 | 0.001 | 1 | 3/15/15 | 36.87 | 0.35 | 78084  |
| 843 | Impala | IMP23  | 0.001 | 1 | 6/26/13 | 36.86 | 0.43 | 7014   |
| 844 | Impala | IMP28  | 0.001 | 1 | 6/27/13 | 36.91 | 0.40 | 7005   |
| 845 | Impala | IMP35  | 0.001 | 1 | 6/28/13 | 36.89 | 0.29 | 8146   |
| 846 | Impala | IMP44  | 0.001 | 1 | 7/10/13 | 36.86 | 0.44 | 16589  |
| 847 | Impala | LM0139 | 0.001 | 1 | 7/20/16 | 36.96 | 0.31 | 35665  |
| 848 | Impala | GGA221 | 0.000 | 0 | 3/17/15 | 36.88 | 0.34 | 12912  |
| 849 | Impala | HAR104 | 0.000 | 0 | 11/2/14 | 36.88 | 0.35 | 59777  |
| 850 | Impala | IMP10  | 0.000 | 0 | 6/25/13 | 36.87 | 0.36 | 20832  |



|     |        |        |       |   |          |       |      |        |
|-----|--------|--------|-------|---|----------|-------|------|--------|
| 851 | Impala | IMP101 | 0.000 | 0 | 10/27/14 | 36.89 | 0.30 | 159037 |
| 852 | Impala | IMP102 | 0.000 | 0 | 10/29/14 | 36.88 | 0.36 | 38262  |
| 853 | Impala | IMP103 | 0.000 | 0 | 10/29/14 | 36.87 | 0.36 | 33965  |
| 854 | Impala | IMP104 | 0.000 | 0 | 10/30/14 | 36.89 | 0.30 | 19513  |
| 855 | Impala | IMP105 | 0.000 | 0 | 10/30/14 | 36.89 | 0.30 | 31323  |
| 856 | Impala | IMP106 | 0.000 | 0 | 10/30/14 | 36.89 | 0.30 | 98457  |
| 857 | Impala | IMP107 | 0.000 | 0 | 10/30/14 | 36.89 | 0.30 | 28813  |
| 858 | Impala | IMP108 | 0.000 | 0 | 10/30/14 | 36.88 | 0.31 | 38560  |
| 859 | Impala | IMP109 | 0.000 | 0 | 11/1/14  | 36.88 | 0.31 | 33977  |
| 860 | Impala | IMP11  | 0.000 | 0 | 6/25/13  | 36.87 | 0.36 | 15324  |
| 861 | Impala | IMP110 | 0.000 | 0 | 11/1/14  | 36.88 | 0.31 | 21344  |
| 862 | Impala | IMP111 | 0.000 | 0 | 11/1/14  | 36.88 | 0.31 | 41377  |
| 863 | Impala | IMP112 | 0.000 | 0 | 11/1/14  | 36.88 | 0.31 | 52956  |
| 864 | Impala | IMP113 | 0.000 | 0 | 11/1/14  | 36.88 | 0.31 | 53668  |
| 865 | Impala | IMP115 | 0.000 | 0 | 11/1/14  | 36.89 | 0.28 | 32519  |
| 866 | Impala | IMP116 | 0.000 | 0 | 11/1/14  | 36.89 | 0.28 | 25909  |
| 867 | Impala | IMP117 | 0.000 | 0 | 11/1/14  | 36.89 | 0.28 | 34562  |
| 868 | Impala | IMP118 | 0.000 | 0 | 11/1/14  | 36.89 | 0.28 | 28633  |
| 869 | Impala | IMP119 | 0.000 | 0 | 11/1/14  | 36.89 | 0.28 | 36116  |
| 870 | Impala | IMP12  | 0.000 | 0 | 6/25/13  | 36.87 | 0.36 | 6567   |
| 871 | Impala | IMP120 | 0.000 | 0 | 11/2/14  | 36.88 | 0.35 | 39438  |
| 872 | Impala | IMP121 | 0.000 | 0 | 11/2/14  | 36.88 | 0.35 | 80824  |
| 873 | Impala | IMP122 | 0.000 | 0 | 11/3/14  | 36.92 | 0.35 | 48185  |
| 874 | Impala | IMP123 | 0.000 | 0 | 11/3/14  | 36.92 | 0.35 | 35568  |
| 875 | Impala | IMP125 | 0.000 | 0 | 11/3/14  | 36.90 | 0.37 | 54336  |
| 876 | Impala | IMP13  | 0.000 | 0 | 6/25/13  | 36.92 | 0.37 | 4093   |
| 877 | Impala | IMP14  | 0.000 | 0 | 6/25/13  | 36.92 | 0.37 | 5486   |
| 878 | Impala | IMP15  | 0.000 | 0 | 6/25/13  | 36.89 | 0.29 | 4358   |
| 879 | Impala | IMP16  | 0.000 | 0 | 6/25/13  | 36.89 | 0.29 | 8542   |
| 880 | Impala | IMP17  | 0.000 | 0 | 6/26/13  | 36.86 | 0.41 | 4810   |
| 881 | Impala | IMP18  | 0.000 | 0 | 6/26/13  | 36.86 | 0.41 | 4289   |
| 882 | Impala | IMP19  | 0.000 | 0 | 6/26/13  | 36.85 | 0.43 | 5822   |
| 883 | Impala | IMP2   | 0.000 | 0 | 6/24/13  | 36.90 | 0.34 | 9442   |
| 884 | Impala | IMP20  | 0.000 | 0 | 6/26/13  | 36.85 | 0.43 | 5071   |
| 885 | Impala | IMP201 | 0.000 | 0 | 3/2/15   | 36.92 | 0.36 | 71747  |
| 886 | Impala | IMP206 | 0.000 | 0 | 3/3/15   | 36.88 | 0.31 | 132601 |
| 887 | Impala | IMP21  | 0.000 | 0 | 6/26/13  | 36.86 | 0.45 | 11206  |
| 888 | Impala | IMP210 | 0.000 | 0 | 3/4/15   | 36.88 | 0.35 | 4759   |
| 889 | Impala | IMP214 | 0.000 | 0 | 3/6/15   | 36.88 | 0.30 | 62476  |

|     |        |        |       |   |         |       |      |        |
|-----|--------|--------|-------|---|---------|-------|------|--------|
| 890 | Impala | IMP217 | 0.000 | 0 | 3/8/15  | 36.87 | 0.38 | 74991  |
| 891 | Impala | IMP22  | 0.000 | 0 | 6/26/13 | 36.86 | 0.43 | 11237  |
| 892 | Impala | IMP220 | 0.000 | 0 | 3/10/15 | 36.91 | 0.40 | 78118  |
| 893 | Impala | IMP221 | 0.000 | 0 | 3/10/15 | 36.91 | 0.40 | 57297  |
| 894 | Impala | IMP222 | 0.000 | 0 | 3/14/15 | 36.91 | 0.34 | 88437  |
| 895 | Impala | IMP227 | 0.000 | 0 | 3/15/15 | 36.91 | 0.30 | 11821  |
| 896 | Impala | IMP229 | 0.000 | 0 | 3/15/15 | 36.91 | 0.30 | 38858  |
| 897 | Impala | IMP231 | 0.000 | 0 | 3/15/15 | 36.91 | 0.32 | 67129  |
| 898 | Impala | IMP24  | 0.000 | 0 | 6/26/13 | 36.86 | 0.43 | 7640   |
| 899 | Impala | IMP25  | 0.000 | 0 | 6/26/13 | 36.89 | 0.28 | 18074  |
| 900 | Impala | IMP26  | 0.000 | 0 | 6/26/13 | 36.89 | 0.29 | 7330   |
| 901 | Impala | IMP27  | 0.000 | 0 | 6/26/13 | 36.89 | 0.29 | 4044   |
| 902 | Impala | IMP29  | 0.000 | 0 | 6/27/13 | 36.91 | 0.40 | 3654   |
| 903 | Impala | IMP3   | 0.000 | 0 | 6/24/13 | 36.90 | 0.34 | 18813  |
| 904 | Impala | IMP30  | 0.000 | 0 | 6/27/13 | 36.91 | 0.40 | 5905   |
| 905 | Impala | IMP31  | 0.000 | 0 | 6/27/13 | 36.88 | 0.31 | 4065   |
| 906 | Impala | IMP32  | 0.000 | 0 | 6/28/13 | 36.89 | 0.29 | 6032   |
| 907 | Impala | IMP33  | 0.000 | 0 | 6/28/13 | 36.89 | 0.29 | 6003   |
| 908 | Impala | IMP38  | 0.000 | 0 | 6/28/13 | 36.89 | 0.28 | 7196   |
| 909 | Impala | IMP39  | 0.000 | 0 | 6/28/13 | 36.90 | 0.36 | 5432   |
| 910 | Impala | IMP4   | 0.000 | 0 | 6/24/13 | 36.90 | 0.34 | 21552  |
| 911 | Impala | IMP40  | 0.000 | 0 | 6/28/13 | 36.90 | 0.36 | 10623  |
| 912 | Impala | IMP41  | 0.000 | 0 | 6/28/13 | 36.90 | 0.36 | 4875   |
| 913 | Impala | IMP42  | 0.000 | 0 | 7/10/13 | 36.90 | 0.43 | 13958  |
| 914 | Impala | IMP43  | 0.000 | 0 | 7/10/13 | 36.86 | 0.48 | 11025  |
| 915 | Impala | IMP45  | 0.000 | 0 | 7/10/13 | 36.86 | 0.44 | 11157  |
| 916 | Impala | IMP47  | 0.000 | 0 | 7/10/13 | 36.86 | 0.44 | 9481   |
| 917 | Impala | IMP5   | 0.000 | 0 | 6/24/13 | 36.90 | 0.34 | 15185  |
| 918 | Impala | IMP50  | 0.000 | 0 | 7/10/13 | 36.86 | 0.40 | 42212  |
| 919 | Impala | IMP6   | 0.000 | 0 | 6/24/13 | 36.89 | 0.28 | 12812  |
| 920 | Impala | IMP7   | 0.000 | 0 | 6/24/13 | 36.89 | 0.28 | 15686  |
| 921 | Impala | IMP8   | 0.000 | 0 | 6/24/13 | 36.89 | 0.28 | 14971  |
| 922 | Impala | IMP9   | 0.000 | 0 | 6/25/13 | 36.87 | 0.36 | 7991   |
| 923 | Impala | LM0013 | 0.000 | 0 | 7/15/16 | 36.89 | 0.29 | 123890 |
| 924 | Impala | LM0014 | 0.000 | 0 | 7/15/16 | 36.89 | 0.29 | 95031  |
| 925 | Impala | LM0015 | 0.000 | 0 | 7/15/16 | 36.89 | 0.29 | 105219 |
| 926 | Impala | LM0016 | 0.000 | 0 | 7/15/16 | 36.89 | 0.29 | 151976 |
| 927 | Impala | LM0017 | 0.000 | 0 | 7/15/16 | 36.87 | 0.34 | 73499  |
| 928 | Impala | LM0018 | 0.000 | 0 | 7/15/16 | 36.87 | 0.34 | 92095  |

|     |        |        |       |   |          |       |      |        |
|-----|--------|--------|-------|---|----------|-------|------|--------|
| 929 | Impala | LM0019 | 0.000 | 0 | 7/15/16  | 36.87 | 0.34 | 189958 |
| 930 | Impala | LM0020 | 0.000 | 0 | 7/15/16  | 36.87 | 0.34 | 191787 |
| 931 | Impala | LM0093 | 0.000 | 0 | 7/19/16  | 36.99 | 0.33 | 67083  |
| 932 | Impala | LM0097 | 0.000 | 0 | 7/19/16  | 36.99 | 0.33 | 8764   |
| 933 | Impala | LM0145 | 0.000 | 0 | 7/21/16  | 36.90 | 0.34 | 11400  |
| 934 | Impala | LM0155 | 0.000 | 0 | 7/22/16  | 36.91 | 0.32 | 48434  |
| 935 | Impala | LM0203 | 0.000 | 0 | 7/25/16  | 36.88 | 0.39 | 123441 |
| 936 | Impala | LM0296 | 0.000 | 0 | 7/10/16  | 36.87 | 0.34 | 73865  |
| 937 | Kudu   | KUD204 | 0.005 | 1 | 3/5/15   | 36.91 | 0.32 | 38857  |
| 938 | Kudu   | KUD213 | 0.004 | 1 | 3/15/15  | 36.91 | 0.32 | 59635  |
| 939 | Kudu   | KUD211 | 0.003 | 1 | 3/14/15  | 36.91 | 0.31 | 92855  |
| 940 | Kudu   | KUD215 | 0.003 | 1 | 3/15/15  | 36.91 | 0.32 | 72696  |
| 941 | Kudu   | KUD202 | 0.002 | 1 | 3/3/15   | 36.91 | 0.32 | 134461 |
| 942 | Kudu   | KUD203 | 0.002 | 1 | 3/5/15   | 36.91 | 0.32 | 50741  |
| 943 | Kudu   | KUD205 | 0.002 | 1 | 3/7/15   | 36.91 | 0.29 | 48001  |
| 944 | Kudu   | KUD206 | 0.002 | 1 | 3/12/15  | 36.91 | 0.32 | 67570  |
| 945 | Kudu   | KUD207 | 0.002 | 1 | 3/12/15  | 36.91 | 0.32 | 57289  |
| 946 | Kudu   | KUD208 | 0.002 | 1 | 3/12/15  | 36.91 | 0.32 | 66279  |
| 947 | Kudu   | KUD209 | 0.002 | 1 | 3/12/15  | 36.91 | 0.32 | 47315  |
| 948 | Kudu   | KUD210 | 0.002 | 1 | 3/12/15  | 36.91 | 0.32 | 94011  |
| 949 | Kudu   | KUD212 | 0.002 | 1 | 3/14/15  | 36.91 | 0.31 | 91104  |
| 950 | Kudu   | KUD201 | 0.001 | 1 | 3/2/15   | 36.91 | 0.31 | 12038  |
| 951 | Kudu   | KUD214 | 0.001 | 1 | 3/15/15  | 36.91 | 0.32 | 75583  |
| 952 | Kudu   | LM0271 | 0.001 | 1 | 7/29/16  |       |      | 4282   |
| 953 | Kudu   | KUD101 | 0.000 | 0 | 10/26/14 | 36.91 | 0.32 | 7313   |
| 954 | Kudu   | KUD102 | 0.000 | 0 | 10/27/14 | 36.91 | 0.31 | 41042  |
| 955 | Kudu   | KUD103 | 0.000 | 0 | 10/27/14 | 36.91 | 0.31 | 63659  |
| 956 | Kudu   | KUD104 | 0.000 | 0 | 10/27/14 | 36.91 | 0.31 | 64476  |
| 957 | Kudu   | KUD105 | 0.000 | 0 | 10/27/14 | 36.91 | 0.31 | 44200  |
| 958 | Kudu   | KUD106 | 0.000 | 0 | 10/27/14 | 36.91 | 0.31 | 38413  |
| 959 | Kudu   | KUD107 | 0.000 | 0 | 10/30/14 | 36.91 | 0.31 | 122664 |
| 960 | Kudu   | KUD108 | 0.000 | 0 | 11/3/14  | 36.91 | 0.32 | 71567  |
| 961 | Kudu   | KUD109 | 0.000 | 0 | 11/3/14  | 36.91 | 0.32 | 31146  |
| 962 | Kudu   | LM0234 | 0.000 | 0 | 7/27/16  | 36.91 | 0.32 | 152512 |
| 963 | Kudu   | LM0272 | 0.000 | 0 | 7/29/16  |       |      | 191351 |
| 964 | Kudu   | LM0307 | 0.000 | 0 | 8/3/16   | 36.91 | 0.32 | 67930  |
| 965 | Oryx   | ORX201 | 0.002 | 1 | 3/3/15   | 36.86 | 0.32 | 7110   |
| 966 | Oryx   | GGA216 | 0.001 | 1 | 3/13/15  | 36.86 | 0.30 | 11849  |
| 967 | Oryx   | LM0105 | 0.001 | 1 | 7/19/16  | 36.97 | 0.33 | 10736  |

|      |              |        |       |   |          |       |      |        |
|------|--------------|--------|-------|---|----------|-------|------|--------|
| 968  | Oryx         | ORX101 | 0.001 | 1 | 10/26/14 | 36.88 | 0.35 | 59061  |
| 969  | Oryx         | ORX104 | 0.001 | 1 | 11/4/14  | 36.88 | 0.32 | 95776  |
| 970  | Oryx         | LM0103 | 0.000 | 0 | 7/19/16  | 36.95 | 0.36 | 10267  |
| 971  | Oryx         | LM0104 | 0.000 | 0 | 7/19/16  | 36.95 | 0.36 | 8327   |
| 972  | Oryx         | LM0135 | 0.000 | 0 | 7/20/16  | 36.96 | 0.31 | 23891  |
| 973  | Oryx         | LM0136 | 0.000 | 0 | 7/20/16  | 36.96 | 0.31 | 9018   |
| 974  | Oryx         | LM0137 | 0.000 | 0 | 7/20/16  | 36.96 | 0.31 | 42286  |
| 975  | Oryx         | LM0138 | 0.000 | 0 | 7/20/16  | 36.96 | 0.31 | 1744   |
| 976  | Oryx         | LM0235 | 0.000 | 0 | 7/27/16  | 36.88 | 0.32 | 53721  |
| 977  | Oryx         | LM0261 | 0.000 | 0 | 7/29/16  | 36.88 | 0.32 | 64127  |
| 978  | Oryx         | LM0262 | 0.000 | 0 | 7/29/16  | 36.88 | 0.32 | 111104 |
| 979  | Oryx         | LM0263 | 0.000 | 0 | 7/29/16  | 36.88 | 0.32 | 4833   |
| 980  | Oryx         | LM0264 | 0.000 | 0 | 7/29/16  | 36.88 | 0.32 | 25382  |
| 981  | Oryx         | ORX102 | 0.000 | 0 | 11/4/14  | 36.88 | 0.32 | 19948  |
| 982  | Oryx         | ORX103 | 0.000 | 0 | 11/4/14  | 36.88 | 0.32 | 67055  |
| 983  | Oryx         | ORX105 | 0.000 | 0 | 11/4/14  | 36.88 | 0.32 | 84785  |
| 984  | Oryx         | ORX106 | 0.000 | 0 | 11/4/14  | 36.88 | 0.32 | 26965  |
| 985  | Oryx         | ORX107 | 0.000 | 0 | 11/4/14  | 36.88 | 0.32 | 39074  |
| 986  | Oryx         | WHO203 | 0.000 | 0 | 3/16/15  | 36.88 | 0.35 | 74423  |
| 987  | Plains zebra | PLA236 | 0.003 | 1 | 3/16/15  | 36.86 | 0.31 | 88030  |
| 988  | Plains zebra | LM0229 | 0.001 | 1 | 7/26/16  | 36.88 | 0.31 | 19228  |
| 989  | Plains zebra | PLA106 | 0.001 | 1 | 10/29/14 | 36.87 | 0.35 | 96280  |
| 990  | Plains zebra | PLA207 | 0.001 | 1 | 3/6/15   | 36.88 | 0.35 | 74575  |
| 991  | Plains zebra | PLA237 | 0.001 | 1 | 3/18/15  | 36.86 | 0.32 | 49392  |
| 992  | Plains zebra | LM0055 | 0.000 | 0 | 7/18/16  | 37.02 | 0.33 | 135070 |
| 993  | Plains zebra | LM0073 | 0.000 | 0 | 7/18/16  | 37.07 | 0.27 | 105516 |
| 994  | Plains zebra | LM0074 | 0.000 | 0 | 7/18/16  | 37.07 | 0.27 | 173093 |
| 995  | Plains zebra | LM0076 | 0.000 | 0 | 7/18/16  | 37.06 | 0.28 | 72975  |
| 996  | Plains zebra | LM0081 | 0.000 | 0 | 7/18/16  | 36.95 | 0.29 | 248590 |
| 997  | Plains zebra | LM0098 | 0.000 | 0 | 7/19/16  | 36.99 | 0.33 | 19989  |
| 998  | Plains zebra | LM0200 | 0.000 | 0 | 7/24/16  | 36.90 | 0.36 | 228458 |
| 999  | Plains zebra | LM0215 | 0.000 | 0 | 7/25/16  | 36.88 | 0.40 | 28027  |
| 1000 | Plains zebra | LM0295 | 0.000 | 0 | 7/10/16  | 36.88 | 0.30 | 204663 |
| 1001 | Plains zebra | PLA01  | 0.000 | 0 | 6/27/13  | 36.88 | 0.36 | 8832   |
| 1002 | Plains zebra | PLA02  | 0.000 | 0 | 6/27/13  | 36.88 | 0.36 | 6600   |
| 1003 | Plains zebra | PLA03  | 0.000 | 0 | 6/27/13  | 36.88 | 0.36 | 9531   |
| 1004 | Plains zebra | PLA04  | 0.000 | 0 | 6/27/13  | 36.88 | 0.36 | 14426  |
| 1005 | Plains zebra | PLA05  | 0.000 | 0 | 6/27/13  | 36.88 | 0.36 | 8966   |
| 1006 | Plains zebra | PLA06  | 0.000 | 0 | 6/27/13  | 36.88 | 0.31 | 6288   |

|      |              |         |       |   |          |       |      |        |
|------|--------------|---------|-------|---|----------|-------|------|--------|
| 1007 | Plains zebra | PLA07   | 0.000 | 0 | 6/27/13  | 36.88 | 0.31 | 12120  |
| 1008 | Plains zebra | PLA08   | 0.000 | 0 | 6/27/13  | 36.88 | 0.31 | 12789  |
| 1009 | Plains zebra | PLA09   | 0.000 | 0 | 6/27/13  | 36.88 | 0.31 | 9635   |
| 1010 | Plains zebra | PLA10   | 0.000 | 0 | 6/27/13  | 36.88 | 0.31 | 8840   |
| 1011 | Plains zebra | PLA101  | 0.000 | 0 | 10/26/14 | 36.88 | 0.35 | 73053  |
| 1012 | Plains zebra | PLA102  | 0.000 | 0 | 10/27/14 | 36.90 | 0.36 | 102842 |
| 1013 | Plains zebra | PLA103  | 0.000 | 0 | 10/27/14 | 36.90 | 0.36 | 75735  |
| 1014 | Plains zebra | PLA104  | 0.000 | 0 | 10/28/14 | 36.86 | 0.36 | 56925  |
| 1015 | Plains zebra | PLA105  | 0.000 | 0 | 10/28/14 | 36.86 | 0.36 | 60585  |
| 1016 | Plains zebra | PLA107  | 0.000 | 0 | 10/29/14 | 36.87 | 0.30 | 74782  |
| 1017 | Plains zebra | PLA108  | 0.000 | 0 | 10/29/14 | 36.87 | 0.30 | 90412  |
| 1018 | Plains zebra | PLA109  | 0.000 | 0 | 10/30/14 | 36.89 | 0.31 | 93595  |
| 1019 | Plains zebra | PLA11   | 0.000 | 0 | 6/27/13  | 36.88 | 0.31 | 12575  |
| 1020 | Plains zebra | PLA110  | 0.000 | 0 | 10/30/14 | 36.89 | 0.31 | 96518  |
| 1021 | Plains zebra | PLA111  | 0.000 | 0 | 10/30/14 | 36.88 | 0.31 | 52209  |
| 1022 | Plains zebra | PLA112  | 0.000 | 0 | 10/30/14 | 36.88 | 0.36 | 39513  |
| 1023 | Plains zebra | PLA113  | 0.000 | 0 | 11/2/14  | 36.89 | 0.28 | 42703  |
| 1024 | Plains zebra | PLA114  | 0.000 | 0 | 11/2/14  | 36.89 | 0.28 | 50236  |
| 1025 | Plains zebra | PLA115  | 0.000 | 0 | 11/2/14  | 36.89 | 0.28 | 51081  |
| 1026 | Plains zebra | PLA116  | 0.000 | 0 | 11/2/14  | 36.89 | 0.28 | 33875  |
| 1027 | Plains zebra | PLA117  | 0.000 | 0 | 11/2/14  | 36.89 | 0.35 | 74893  |
| 1028 | Plains zebra | PLA118  | 0.000 | 0 | 11/2/14  | 36.89 | 0.35 | 42535  |
| 1029 | Plains zebra | PLA12   | 0.000 | 0 | 6/28/13  | 36.89 | 0.28 | 8639   |
| 1030 | Plains zebra | PLA13   | 0.000 | 0 | 6/28/13  | 36.88 | 0.31 | 12264  |
| 1031 | Plains zebra | PLA14   | 0.000 | 0 | 6/28/13  | 36.88 | 0.31 | 10072  |
| 1032 | Plains zebra | PLA15   | 0.000 | 0 | 6/28/13  | 36.89 | 0.35 | 9655   |
| 1033 | Plains zebra | PLA16   | 0.000 | 0 | 7/2/13   | 36.88 | 0.36 | 7384   |
| 1034 | Plains zebra | PLA17   | 0.000 | 0 | 7/2/13   | 36.88 | 0.36 | 9929   |
| 1035 | Plains zebra | PLA18_R | 0.000 | 0 | 7/3/13   | 36.88 | 0.32 | 9580   |
| 1036 | Plains zebra | PLA19   | 0.000 | 0 | 7/3/13   | 36.88 | 0.30 | 7260   |
| 1037 | Plains zebra | PLA20   | 0.000 | 0 | 7/3/13   | 36.88 | 0.30 | 10178  |
| 1038 | Plains zebra | PLA201  | 0.000 | 0 | 3/2/15   | 36.89 | 0.36 | 88262  |
| 1039 | Plains zebra | PLA202  | 0.000 | 0 | 3/4/15   | 36.86 | 0.32 | 97059  |
| 1040 | Plains zebra | PLA203  | 0.000 | 0 | 3/4/15   | 36.86 | 0.32 | 56313  |
| 1041 | Plains zebra | PLA204  | 0.000 | 0 | 3/4/15   | 36.86 | 0.32 | 89884  |
| 1042 | Plains zebra | PLA205  | 0.000 | 0 | 3/4/15   | 36.87 | 0.33 | 91128  |
| 1043 | Plains zebra | PLA206  | 0.000 | 0 | 3/6/15   | 36.88 | 0.35 | 95989  |
| 1044 | Plains zebra | PLA208  | 0.000 | 0 | 3/13/15  | 36.88 | 0.34 | 126293 |
| 1045 | Plains zebra | PLA209  | 0.000 | 0 | 3/13/15  | 36.88 | 0.34 | 80890  |

|      |              |         |       |   |         |       |      |       |
|------|--------------|---------|-------|---|---------|-------|------|-------|
| 1046 | Plains zebra | PLA21   | 0.000 | 0 | 7/4/13  | 36.89 | 0.34 | 11090 |
| 1047 | Plains zebra | PLA210  | 0.000 | 0 | 3/11/15 | 36.90 | 0.35 | 33532 |
| 1048 | Plains zebra | PLA211  | 0.000 | 0 | 3/11/15 | 36.87 | 0.33 | 75797 |
| 1049 | Plains zebra | PLA212  | 0.000 | 0 | 3/11/15 | 36.87 | 0.33 | 33444 |
| 1050 | Plains zebra | PLA213  | 0.000 | 0 | 3/11/15 | 36.87 | 0.33 | 32383 |
| 1051 | Plains zebra | PLA214  | 0.000 | 0 | 3/11/15 | 36.90 | 0.36 | 21799 |
| 1052 | Plains zebra | PLA215  | 0.000 | 0 | 3/11/15 | 36.90 | 0.35 | 25987 |
| 1053 | Plains zebra | PLA216  | 0.000 | 0 | 3/11/15 | 36.90 | 0.36 | 18518 |
| 1054 | Plains zebra | PLA217  | 0.000 | 0 | 3/11/15 | 36.90 | 0.35 | 23215 |
| 1055 | Plains zebra | PLA218  | 0.000 | 0 | 3/11/15 | 36.88 | 0.36 | 31052 |
| 1056 | Plains zebra | PLA219  | 0.000 | 0 | 3/13/15 | 36.89 | 0.39 | 20713 |
| 1057 | Plains zebra | PLA22   | 0.000 | 0 | 7/5/13  | 36.89 | 0.32 | 8855  |
| 1058 | Plains zebra | PLA220  | 0.000 | 0 | 3/13/15 | 36.89 | 0.39 | 9896  |
| 1059 | Plains zebra | PLA221  | 0.000 | 0 | 3/13/15 | 36.89 | 0.39 | 14652 |
| 1060 | Plains zebra | PLA222  | 0.000 | 0 | 3/13/15 | 36.89 | 0.39 | 12969 |
| 1061 | Plains zebra | PLA223  | 0.000 | 0 | 3/13/15 | 36.87 | 0.30 | 9911  |
| 1062 | Plains zebra | PLA224  | 0.000 | 0 | 3/13/15 | 36.87 | 0.30 | 12309 |
| 1063 | Plains zebra | PLA225  | 0.000 | 0 | 3/13/15 | 36.87 | 0.30 | 8831  |
| 1064 | Plains zebra | PLA226  | 0.000 | 0 | 3/14/15 | 36.90 | 0.39 | 11861 |
| 1065 | Plains zebra | PLA227  | 0.000 | 0 | 3/14/15 | 36.88 | 0.39 | 14071 |
| 1066 | Plains zebra | PLA228  | 0.000 | 0 | 3/14/15 | 36.88 | 0.40 | 12278 |
| 1067 | Plains zebra | PLA229  | 0.000 | 0 | 3/14/15 | 36.89 | 0.39 | 10454 |
| 1068 | Plains zebra | PLA23   | 0.000 | 0 | 7/5/13  | 36.88 | 0.37 | 9347  |
| 1069 | Plains zebra | PLA230  | 0.000 | 0 | 3/14/15 | 36.89 | 0.39 | 17664 |
| 1070 | Plains zebra | PLA231  | 0.000 | 0 | 3/14/15 | 36.87 | 0.32 | 10628 |
| 1071 | Plains zebra | PLA232  | 0.000 | 0 | 3/14/15 | 36.87 | 0.32 | 65455 |
| 1072 | Plains zebra | PLA233  | 0.000 | 0 | 3/14/15 | 36.87 | 0.32 | 90570 |
| 1073 | Plains zebra | PLA234  | 0.000 | 0 | 3/15/15 | 36.88 | 0.39 | 74516 |
| 1074 | Plains zebra | PLA235  | 0.000 | 0 | 3/16/15 | 36.86 | 0.31 | 59889 |
| 1075 | Plains zebra | PLA24   | 0.000 | 0 | 7/5/13  | 36.88 | 0.32 | 7772  |
| 1076 | Plains zebra | PLA25_R | 0.000 | 0 | 7/8/13  | 36.88 | 0.36 | 6194  |
| 1077 | Plains zebra | PLA26_R | 0.000 | 0 | 7/9/13  | 36.88 | 0.36 | 7598  |
| 1078 | Plains zebra | PLA27_R | 0.000 | 0 | 7/10/13 | 36.87 | 0.48 | 20224 |
| 1079 | Plains zebra | PLA28_R | 0.000 | 0 | 7/10/13 | 36.93 | 0.37 | 5068  |
| 1080 | Plains zebra | PLA29_R | 0.000 | 0 | 7/11/13 | 36.87 | 0.36 | 7447  |
| 1081 | Plains zebra | PLA30_R | 0.000 | 0 | 7/11/13 | 36.91 | 0.34 | 9269  |
| 1082 | Plains zebra | PLA31_R | 0.000 | 0 | 7/12/13 | 36.89 | 0.36 | 8236  |
| 1083 | Plains zebra | PLA32_R | 0.000 | 0 | 7/15/13 | 36.91 | 0.40 | 8737  |
| 1084 | Plains zebra | PLA33_R | 0.000 | 0 | 7/15/13 |       |      | 12358 |

|      |              |          |       |   |          |       |      |        |
|------|--------------|----------|-------|---|----------|-------|------|--------|
| 1085 | Plains zebra | PLA34_R  | 0.000 | 0 | 7/15/13  |       |      | 9175   |
| 1086 | Plains zebra | PLA35_R  | 0.000 | 0 | 7/16/13  |       |      | 4772   |
| 1087 | Plains zebra | PLA36_R  | 0.000 | 0 | 7/16/13  |       |      | 13846  |
| 1088 | Plains zebra | PLA37_R  | 0.000 | 0 | 7/16/13  |       |      | 9656   |
| 1089 | Plains zebra | PLA38_R  | 0.000 | 0 | 7/16/13  |       |      | 10644  |
| 1090 | Plains zebra | PLA39_R  | 0.000 | 0 | 7/16/13  |       |      | 7740   |
| 1091 | Plains zebra | PLA40_R  | 0.000 | 0 | 7/16/13  |       |      | 13097  |
| 1092 | Plains zebra | PLA41_R  | 0.000 | 0 | 7/16/13  |       |      | 10951  |
| 1093 | Sheep        | SHE211   | 0.003 | 1 | 3/7/15   | 36.89 | 0.32 | 73143  |
| 1094 | Sheep        | LM0188   | 0.002 | 1 | 7/24/16  | 36.87 | 0.36 | 37491  |
| 1095 | Sheep        | SHE118_R | 0.002 | 1 | 11/2/14  | 36.87 | 0.34 | 2356   |
| 1096 | Sheep        | SHE119_R | 0.002 | 1 | 11/2/14  | 36.87 | 0.34 | 27986  |
| 1097 | Sheep        | LM0192   | 0.001 | 1 | 7/24/16  | 36.87 | 0.36 | 72266  |
| 1098 | Sheep        | SHE104   | 0.001 | 1 | 10/29/14 | 36.87 | 0.34 | 34915  |
| 1099 | Sheep        | SHE113   | 0.001 | 1 | 11/2/14  | 36.87 | 0.34 | 52024  |
| 1100 | Sheep        | SHE203   | 0.001 | 1 | 3/7/15   | 36.89 | 0.32 | 52463  |
| 1101 | Sheep        | SHE206   | 0.001 | 1 | 3/7/15   | 36.89 | 0.32 | 60891  |
| 1102 | Sheep        | SHE208   | 0.001 | 1 | 3/7/15   | 36.89 | 0.32 | 62256  |
| 1103 | Sheep        | LM0165   | 0.000 | 0 | 7/22/16  | 36.90 | 0.32 | 3830   |
| 1104 | Sheep        | LM0166   | 0.000 | 0 | 7/22/16  | 36.90 | 0.32 | 8082   |
| 1105 | Sheep        | LM0167   | 0.000 | 0 | 7/22/16  | 36.90 | 0.32 | 41645  |
| 1106 | Sheep        | LM0168   | 0.000 | 0 | 7/22/16  | 36.90 | 0.32 | 5416   |
| 1107 | Sheep        | LM0169   | 0.000 | 0 | 7/22/16  | 36.90 | 0.32 | 133276 |
| 1108 | Sheep        | LM0170   | 0.000 | 0 | 7/22/16  | 36.90 | 0.32 | 21627  |
| 1109 | Sheep        | LM0171   | 0.000 | 0 | 7/22/16  | 36.90 | 0.32 | 53279  |
| 1110 | Sheep        | LM0172   | 0.000 | 0 | 7/22/16  | 36.90 | 0.32 | 29551  |
| 1111 | Sheep        | LM0173   | 0.000 | 0 | 7/22/16  | 36.90 | 0.32 | 7860   |
| 1112 | Sheep        | LM0174   | 0.000 | 0 | 7/22/16  | 36.90 | 0.32 | 8431   |
| 1113 | Sheep        | LM0187   | 0.000 | 0 | 7/24/16  | 36.87 | 0.36 | 97187  |
| 1114 | Sheep        | LM0189   | 0.000 | 0 | 7/24/16  | 36.87 | 0.36 | 29205  |
| 1115 | Sheep        | LM0190   | 0.000 | 0 | 7/24/16  | 36.87 | 0.36 | 26294  |
| 1116 | Sheep        | LM0191   | 0.000 | 0 | 7/24/16  | 36.87 | 0.36 | 4924   |
| 1117 | Sheep        | LM0193   | 0.000 | 0 | 7/24/16  | 36.87 | 0.36 | 128799 |
| 1118 | Sheep        | LM0194   | 0.000 | 0 | 7/24/16  | 36.87 | 0.36 | 2966   |
| 1119 | Sheep        | LM0311   | 0.000 | 0 | 8/3/16   | 36.88 | 0.36 | 111747 |
| 1120 | Sheep        | SHE101   | 0.000 | 0 | 10/29/14 | 36.87 | 0.34 | 51677  |
| 1121 | Sheep        | SHE102   | 0.000 | 0 | 10/29/14 | 36.87 | 0.34 | 27523  |
| 1122 | Sheep        | SHE103   | 0.000 | 0 | 10/29/14 | 36.87 | 0.34 | 40346  |
| 1123 | Sheep        | SHE105   | 0.000 | 0 | 10/29/14 | 36.87 | 0.34 | 36292  |

|      |         |          |       |   |          |       |      |        |
|------|---------|----------|-------|---|----------|-------|------|--------|
| 1124 | Sheep   | SHE106   | 0.000 | 0 | 10/29/14 | 36.87 | 0.34 | 25503  |
| 1125 | Sheep   | SHE107   | 0.000 | 0 | 10/29/14 | 36.87 | 0.34 | 40264  |
| 1126 | Sheep   | SHE108   | 0.000 | 0 | 10/29/14 | 36.87 | 0.34 | 26437  |
| 1127 | Sheep   | SHE109   | 0.000 | 0 | 10/29/14 | 36.87 | 0.34 | 77055  |
| 1128 | Sheep   | SHE110   | 0.000 | 0 | 10/29/14 | 36.87 | 0.34 | 54982  |
| 1129 | Sheep   | SHE111   | 0.000 | 0 | 10/29/14 | 36.87 | 0.34 | 50033  |
| 1130 | Sheep   | SHE112   | 0.000 | 0 | 11/2/14  | 36.87 | 0.34 | 59128  |
| 1131 | Sheep   | SHE114   | 0.000 | 0 | 11/2/14  | 36.87 | 0.34 | 106958 |
| 1132 | Sheep   | SHE115   | 0.000 | 0 | 11/2/14  | 36.87 | 0.34 | 75838  |
| 1133 | Sheep   | SHE120_R | 0.000 | 0 | 11/2/14  | 36.87 | 0.34 | 24252  |
| 1134 | Sheep   | SHE201   | 0.000 | 0 | 3/7/15   | 36.89 | 0.32 | 68432  |
| 1135 | Sheep   | SHE202   | 0.000 | 0 | 3/7/15   | 36.89 | 0.32 | 89734  |
| 1136 | Sheep   | SHE204   | 0.000 | 0 | 3/7/15   | 36.89 | 0.32 | 47419  |
| 1137 | Sheep   | SHE205   | 0.000 | 0 | 3/7/15   | 36.89 | 0.32 | 71299  |
| 1138 | Sheep   | SHE207   | 0.000 | 0 | 3/7/15   | 36.89 | 0.32 | 51674  |
| 1139 | Sheep   | SHE209   | 0.000 | 0 | 3/7/15   | 36.89 | 0.32 | 63451  |
| 1140 | Sheep   | SHE210   | 0.000 | 0 | 3/7/15   | 36.89 | 0.32 | 46855  |
| 1141 | Warthog | WAR201   | 0.002 | 1 | 3/4/15   | 36.89 | 0.36 | 9005   |
| 1142 | Warthog | WHO103   | 0.002 | 1 | 3/18/15  | 36.89 | 0.30 | 105052 |
| 1143 | Warthog | LM0157   | 0.001 | 1 | 7/22/16  | 36.89 | 0.31 | 25630  |
| 1144 | Warthog | LM0158   | 0.001 | 1 | 7/22/16  | 36.89 | 0.31 | 33540  |
| 1145 | Warthog | WAR105   | 0.001 | 1 | 10/29/14 | 36.87 | 0.36 | 88516  |
| 1146 | Warthog | LM0148   | 0.000 | 0 | 7/21/16  | 36.87 | 0.37 | 90970  |
| 1147 | Warthog | LM0149   | 0.000 | 0 | 7/21/16  | 36.86 | 0.34 | 7966   |
| 1148 | Warthog | LM0156   | 0.000 | 0 | 7/22/16  | 36.89 | 0.31 | 52300  |
| 1149 | Warthog | LM0159   | 0.000 | 0 | 7/22/16  | 36.89 | 0.31 | 35635  |
| 1150 | Warthog | LM0160   | 0.000 | 0 | 7/22/16  | 36.89 | 0.31 | 127799 |
| 1151 | Warthog | LM0161   | 0.000 | 0 | 7/22/16  | 36.89 | 0.31 | 4512   |
| 1152 | Warthog | LM0230   | 0.000 | 0 | 7/27/16  | 36.87 | 0.36 | 9107   |
| 1153 | Warthog | LM0244   | 0.000 | 0 | 7/28/16  | 36.89 | 0.28 | 47427  |
| 1154 | Warthog | LM0245   | 0.000 | 0 | 7/28/16  | 36.89 | 0.28 | 5383   |
| 1155 | Warthog | WAR101   | 0.000 | 0 | 10/28/14 | 36.87 | 0.36 | 66715  |
| 1156 | Warthog | WAR102   | 0.000 | 0 | 10/28/14 | 36.87 | 0.36 | 71209  |
| 1157 | Warthog | WAR103   | 0.000 | 0 | 10/28/14 | 36.87 | 0.36 | 21820  |
| 1158 | Warthog | WAR104   | 0.000 | 0 | 10/29/14 | 36.87 | 0.36 | 55251  |
| 1159 | Warthog | WAR106   | 0.000 | 0 | 10/29/14 | 36.87 | 0.36 | 34869  |
| 1160 | Warthog | WAR107   | 0.000 | 0 | 10/30/14 | 36.88 | 0.31 | 19283  |
| 1161 | Warthog | WAR108   | 0.000 | 0 | 10/30/14 | 36.88 | 0.31 | 50328  |
| 1162 | Warthog | WAR109   | 0.000 | 0 | 10/30/14 | 36.88 | 0.31 | 39981  |



|      |           |        |       |   |          |       |      |        |
|------|-----------|--------|-------|---|----------|-------|------|--------|
| 1163 | Warthog   | WAR110 | 0.000 | 0 | 10/30/14 | 36.88 | 0.31 | 61554  |
| 1164 | Warthog   | WAR111 | 0.000 | 0 | 11/1/14  | 36.88 | 0.35 | 116562 |
| 1165 | Warthog   | WAR202 | 0.000 | 0 | 3/10/15  | 36.88 | 0.36 | 10429  |
| 1166 | Warthog   | WAR203 | 0.000 | 0 | 3/10/15  | 36.88 | 0.36 | 2140   |
| 1167 | Warthog   | WAR204 | 0.000 | 0 | 3/10/15  | 36.90 | 0.28 | 17324  |
| 1168 | Warthog   | WAR205 | 0.000 | 0 | 3/13/15  | 36.88 | 0.32 | 1882   |
| 1169 | Warthog   | WAR206 | 0.000 | 0 | 3/18/15  | 36.90 | 0.36 | 17874  |
| 1170 | Warthog   | WHO101 | 0.000 | 0 | 10/27/14 | 36.88 | 0.31 | 48449  |
| 1171 | Waterbuck | ELA203 | 0.002 | 1 | 3/8/15   | 36.90 | 0.29 | 9590   |
| 1172 | Waterbuck | LM0026 | 0.001 | 1 | 7/16/16  | 36.91 | 0.29 | 162616 |
| 1173 | Waterbuck | LM0027 | 0.001 | 1 | 7/16/16  | 36.91 | 0.29 | 216227 |
| 1174 | Waterbuck | LM0029 | 0.001 | 1 | 7/16/16  | 36.91 | 0.28 | 196627 |
| 1175 | Waterbuck | WAT101 | 0.001 | 1 | 11/5/14  | 36.90 | 0.33 | 65504  |
| 1176 | Waterbuck | WAT102 | 0.000 | 0 | 11/5/14  | 36.90 | 0.29 | 59936  |

**Legends for Movies S1 to S4.**

**Movie S1 (separate file).** Elephant eating transplanted *Cynanchum*.

**Movie S2 (separate file).** Giraffe eating transplanted *Cynanchum*.

**Movie S3 (separate file).** Impala eating transplanted *Cynanchum*.

**Movie S4 (separate file).** Eland eating transplanted *Cynanchum*.

### List of data deposited in Dryad.

The following data files are available on Dryad (reference S4). The original DNA-metabarcoding data underlying Fig. 1E and Tables S1 and S2 are archived separately in Dryad (reference S3).

- 1) Cafeteria trial data (data underlying Fig. 1F; Feeding\_Trial.csv)
- 2) Desiccation trial data (no corresponding figure; Desiccation\_Trial.csv)
- 3) UHURU liana prevalence surveys (data underlying Fig. 2 A, C, and D; UHURU\_Liana\_Survey.csv)
- 4) UHURU transect surveys (data underlying Fig. 2 E and F; UHURU\_Transect\_Survey.csv)
- 5) UHURU tree survey (data underlying Fig. 2B; UHURU\_Tree\_Biomass\_and\_Density.csv)
- 6) GLADE liana prevalence and effects of herbivore reintroduction (data underlying Fig. 3; GLADE\_Liana\_Prevalence\_And\_Herbivore\_Reintroduction\_Survey.csv)
- 7) Liana growth surveys (no corresponding figure; Liana\_Growth\_Survey.csv)
- 8) Liana-removal experiment (data underlying Fig. 4A; Liana\_Removal\_Experiment.csv)
- 9) Tree reproductive survey (data underlying Fig. 4B; Acacia\_Reproductive\_Survey.csv)
- 10) UHURU 2018 canopy-intercept survey (data underlying Fig. S1 A and B; UHURU\_Canopy\_Intercept\_Survey.csv)
- 11) UHURU Cynanchum understory survey (data underlying Fig. S1 C and D; UHURU\_Cynanchum\_Understory\_Survey.csv)

## SI References

- S1. T. R. Kartzinel, J. C. Hsing, P. M. Musili, B. R. P. Brown, R. M. Pringle, Covariation of diet and gut microbiome in African megafauna. *Proc. Natl. Acad. Sci. U.S.A.* **116**, 23588–23593 (2019).
- S2. T. R. Kartzinel, R. M. Pringle, Multiple dimensions of dietary diversity in large mammalian herbivores. *J. Anim. Ecol.* **89**, 1482–1496 (2020).
- S3. T. R. Kartzinel, J. C. Hsing, P. M. Musili, R. M. Pringle, Data from: Covariation of diet and gut microbiome in African megafauna. *Dryad Digital Repository*, <https://doi.org/10.5061/dryad.c119gm5> (2020).
- S4. T. C. Coverdale et al., Data from: Large herbivores suppress liana infestation in an African savanna. *Dryad Digital Repository*, <https://doi.org/10.5061/dryad.gmsbcc2np> (2021).
